# 1 Abstract

Hybridization between related species results in the formation of an allopolyploid with multiple subgenomes. These subgenomes will each contain complete, yet evolutionarily divergent, sets of genes. Like a diploid hybrid, allopolyploids will have two versions, or homeoalleles, for every gene. Partial functional redundancy between homeologous genes should result in a deviation from additivity. These epistatic interactions between homeoalleles are analogous to dominance effects, but are fixed across subgenomes through self pollination. An allopolyploid can be viewed as an immortalized hybrid, with the opportunity to select and fix favorable homeoallelic interactions within inbred varieties. We present a subfunctionalization epistasis model to estimate the degree of functional redundancy between homeoallelic loci and a statistical framework to determine their importance within a population. We provide an example using the homeologous dwarfing genes of allohexaploid wheat, *Rht-1*, and search for genome-wide patterns indicative of homeoallelic subfunctionalization in a breeding population. Using the IWGSC RefSeq v1.0 sequence, 23,796 homeoallelic gene sets were identified and anchored to the nearest DNA marker to form 10,172 homeologous marker sets. Interaction predictors constructed from products of marker scores were used to fit the homeologous main and interaction effects, as well as estimate whole genome genetic values. Some traits displayed a pattern indicative of homeoallelic subfunctionalization, while other traits showed a less clear pattern or were not affected. Using genomic prediction accuracy to evaluate importance of marker interactions, we show that homeologous interactions explain a portion of the non-additive genetic signal, but are less important than other epistatic interactions.

## 1.1 keywords

Allopolyploidy | Homeologous | Epistasis | Subfunctionalization | Heterosis | Genomic Prediction

## 29 **2 Introduction**

30 Whole genome duplication events are ubiquitous in the plant kingdom. The impact of these  
31 duplications on angiosperm evolution was not truly appreciated until the ability to sequence  
32 entire genomes elucidated their omnipresence (Soltis et al. 2009). Haldane (1933), postulated  
33 that single gene duplication allowed one copy to diverge through mutation while metabolic  
34 function was maintained by the other copy. (Ohno 1970) reintroduced this hypothesis,  
35 and it has since been validated both theoretically (Ohta 1987; Walsh 1995; Lynch and  
36 Conery 2000), and empirically (Blanc and Wolfe 2004; Duarte et al. 2005; Liu, Baute,  
37 and Adams 2011; Assis and Bachtrog 2013). The duplicated gene hypothesis does not,  
38 however, generally explain the apparent advantage of duplicating an entire suite of genes.  
39 The necessity of genetic diversity for plant populations to survive and adapt to divergent or  
40 changing environments may help to explain this pervasive phenomenon.

41 The need for gene diversity can become more immediate in plants than in animals, where  
42 the latter can simply migrate to “greener pastures” when conditions become unfavorable.  
43 Plants lack substantial within generation mobility and must therefore change gene expression  
44 to cope with changing environmental conditions. Many species maintain gene diversity  
45 through alternate splicing, but this has been shown to be less common in plants than in  
46 other eukaryotes (Nagasaki et al. 2005). Whole genome duplication can generate the raw  
47 materials for the maintenance of genetic diversity (Wendel 2000; Adams and Wendel 2005).  
48 Gault (2018) demonstrated that similar sets of duplicated genes were preserved in two related  
49 genera, *Zea* and *Tripsacum*, millions of years after a shared paleopolyploidization event. This  
50 conserved pattern in purifying selection suggests that, at least for some genes, there is a clear  
51 advantage to maintaining two copies.

52 The union of two complete, yet divergent, genomes during the formation of an allopolyploid  
53 introduces manifold novel gene pathways that can specialize to specific tissues or en-  
54 vironments (Blanc and Wolfe 2004). Similar to diploid hybrids, the formation of an al-  
55 lopolyploid results in a homogeneous population, but heterozygosity is maintained across

56 homeologous sites rather than homologous sites. Unlike diploid hybrids that lose heterozy-  
57 gosity in subsequent generations, the homeoallelic heterozygosity is fixed through selfing in  
58 the allopolyploid. Mac Key (1970) postulated a trade off between new-creating (alogamous)  
59 and self preserving (autogamous) mating systems, where allopolyploids favor self pollination  
60 to preserve diverse sets of alleles across their subgenomes. As such, an allopolyploid may be  
61 thought of as an immortalized hybrid, with heterosis fixed across subgenomes (Ellstrand and  
62 Schierenbeck 2000; Feldman et al. 2012). While still hotly debated, evidence is mounting  
63 that allopolyploids exhibit a true heterotic response as traditional hybrids have demonstrated  
64 (Wendel 2000; Adams and Wendel 2005; Chen 2010; Chen 2013).

65 Birchler et al. (2010) note that newly synthesized allopolyploids often outperform their  
66 sub-genome progenitors, and that the heterotic response appears to be exaggerated in wider  
67 inter-specific crosses. This seems to hold true even within species, where autopolyploids tend  
68 to exhibit higher vigor from wider crosses (Bingham et al. 1994; Segovia-Lerma et al. 2004).  
69 The overwhelming prevalence of allopolyploidy to autopolyploidy in plant species (Soltis  
70 and Soltis 2009) may suggest that it is the increase in allelic diversity *per se* that is the  
71 primary driver for this observed tendency toward genome duplication. Instead of allowing  
72 genes to change function after a duplication event, alleles may develop novel function prior  
73 to their reunion during an allopolyploidization event. The branched gene networks of the  
74 allopolyploid may provide the organism with the versatility to thrive in a broader ecological  
75 landscape than those of its sub-genome ancestors (Mac Key 1970; Ellstrand and Schierenbeck  
76 2000; Osborn et al. 2003).

77 Subfunctionalization and neofunctionalization are often described as distinct evolution-  
78 ary processes. Neofunctionalization implies the duplicated genes have completely novel,  
79 non-redundant function (Ohno 1970). Subfunctionalization is described as a partitioning  
80 of ancestral function through degenerate mutations in both copies, such that both genes  
81 must be expressed for physiological function (Stoltzfus 1999; Force et al. 1999; Lynch and  
82 Force 2000). However, barring total functional gene loss, many mutations will have some

83 quantitative effect on protein kinetics or expression (Zeng and Cockerham 1993). Duplicated  
84 genes will demonstrate some quantitative degree of functional redundancy until the ultimate  
85 fate of neofunctionalization (i.e. complete additivity) or gene loss (pseudogenization) of one  
86 copy. It has been proposed that essentially all neofunctionalization processes undergo a  
87 subfunctionalization transition state (Rastogi and Liberles 2005).

88 If the mutations occur before the duplication event, as in allopolyploidy, the two variants  
89 are unlikely to have degenerate mutations. Instead, they may have differing optimal condi-  
90 tions in which they function or are expressed. The advantage of different variants at a single  
91 locus (Allard and Bradshaw 1964, alleles) or at duplicated loci (Mac Key 1970, homeoalleles)  
92 can result in greater plasticity to environmental changes. Allopolyploidization has been sug-  
93 gested as an evolutionary strategy to obtain the genic diversity necessary for invasive plant  
94 species to adapt to the new environments they invade (Ellstrand and Schierenbeck 2000;  
95 Beest et al. 2011).

96 Adams et al. (2003) showed that some homeoallelic genes in cotton were expressed in  
97 an organ specific manner, such that expression of one homeolog effectively suppressed the  
98 expression of the other in some tissues. These results have since been confirmed in other  
99 crops such as wheat (Pumphrey et al. 2009; Akhunova et al. 2010; Feldman et al. 2012;  
100 Pfeifer et al. 2014), and evidence for neofunctionalization of homeoallelic genes has been  
101 observed (Chaudhary et al. 2009). Differential expression of homeologous gene transcripts  
102 has also been shown to shift upon challenge with heat, drought (Liu et al. 2015) and salt  
103 stress (Zhang et al. 2016) in wheat, as well as water submersion and cold in cotton (Liu and  
104 Adams 2007).

105 Common wheat (*Triticum aestivum*) provides an example of an allopolyploid that has  
106 surpassed its diploid ancestors in its value to humans as a staple source of calories. Hexaploid  
107 wheat has undergone two allopolyploid events, the most recent of which occurred between  
108 10 and 400 thousand years ago, adding the D genome to the A and B genomes (Marcussen  
109 et al. 2014). The gene diversity provided by these three genome ancestors may explain why

110 allohexaploid wheat has adapted from its source in southwest Asia to wide spread cultivation  
111 around the globe (Dubcovsky and Dvořák 2007; Feldman and Levy 2012).

112 In the absence of outcrossing in inbred populations, selection can only act on individuals,  
113 changing their frequency within the population. If the selection pressure changes (e.g. for  
114 modern agriculture), combinations of homeoalleles within existing individuals may not be  
115 ideal for the new set of environments and traits. This presents an opportunity for plant breed-  
116 ers to capitalize on this feature of allopolyploids by making crosses to form new individuals  
117 with complementary sets of homeoalleles. Many of these advantageous combinations have  
118 likely been indirectly selected throughout the history of wheat domestication and modern  
119 breeding.

120 A crucial example involves the two homeologous dwarfing genes (Börner et al. 1996)  
121 important in the Green Revolution, which implemented semi-dwarf varieties to combat crop  
122 loss due to nitrogen application and subsequent lodging. We discuss this example in detail,  
123 and use it as a starting point to justify the search for homeologous interactions. While the  
124 effect of allopolyploidy has been demonstrated at both the transcript level and whole plant  
125 level, we are unaware of attempts to use genome-wide homeologous interaction predictors to  
126 model whole plant level phenotypes such as growth, phenology and grain yield traits.

127 Using a soft winter wheat breeding population, we demonstrate that epistatic interactions  
128 account for a significant portion of genetic variance and are abundant throughout the genome.  
129 Some of these interactions occur between homeoallelic regions and we demonstrate their  
130 potential as targets for selection. If advantageous homeoallelic interactions can be identified,  
131 they could be directly selected to increase homeoallelic diversity, with the potential to expand  
132 the environmental landscape to which a variety is adapted.

133 We hypothesize that the presence of two evolutionarily divergent genes with partially  
134 redundant function leads to a less than additive gene interaction, and introduce this as a  
135 subfunctionalization model of epistasis.

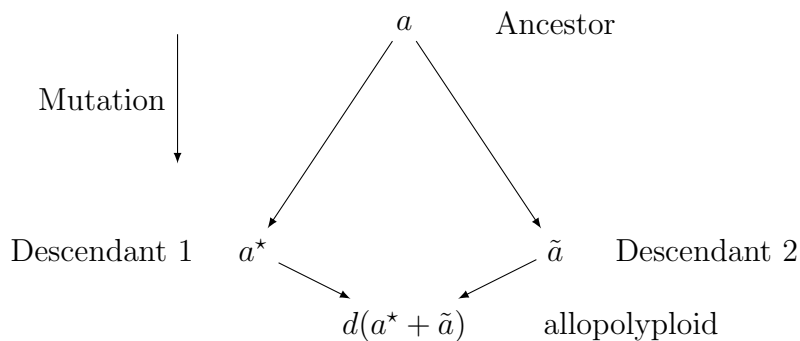

Figure 1: Diagram of subfunctionalization where  $a$  is the effect of a functional allele,  $a^*$  and  $\tilde{a}$  are the effects of the descendant alleles, and  $d$  is the subfunctionalization (or divergence) coefficient.

### 3 Subfunctionalization Epistasis

We generalize the duplicate factor model of epistasis from Hill et al. (2008), by introducing a subfunctionalization coefficient  $d$ , that allows the interaction to shift between the duplicate factor and additive models. Let us consider an ancestral allele with an effect  $a$ . Through mutation, the effect of this locus is allowed to diverge from the ancestral allele to have effects  $a^*$  and  $\tilde{a}$  in the two descendant species. When the two divergent loci are brought back together in the same nucleus, the effect of combining these becomes  $d(a^* + \tilde{a})$  (Figure 1).

Values of  $d < 1$ , indicate a less-than additive epistasis (Eshed and Zamir 1996), in this case, resulting from redundant gene function. When  $d = 1/2$ , and  $a^* = \tilde{a}$ , the descendant alleles have maintained the same function and the duplicate factor model is obtained. As  $d$  exceeds  $1/2$ , the descendant alleles diverge in function (i.e. subfunctionalization), until  $d$  reaches 1, implying that the two genes evolved completely non-redundant function (i.e. neofunctionalization). At the point where  $d = 1$ , the effect becomes completely additive.

For values of  $d > 1/2$ , the benefit of multiple alleles is realized in a model analogous to overdominance in traditional hybrids. As alleles diverge they can pick up advantageous function under certain environmental conditions. The homeo-heterozygote then gains an advantage if it experiences conditions of both adapted homeoalleles. Values of  $d < 1/2$  may indicate allelic interference (Herskowitz 1987), a phenomenon that has been observed in many

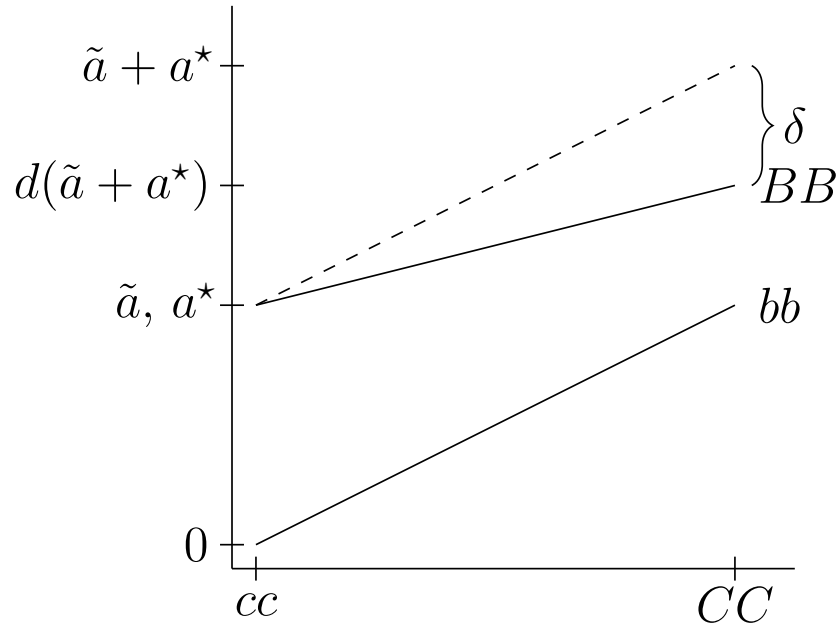

Figure 2: Epistatic interaction of two loci,  $B$  and  $C$ , with the expected effects for the  $\{0, 1\}$  parameterization.  $\delta$  indicates the deviation of the  $BBCc$  genotype from an additive model for the  $\{0, 1\}$  parameterization, where  $d = 1 + \frac{\delta}{\tilde{a} + a^*}$ . The dotted line indicates the expectation under the additive model.

154 newly formed allopolyploids (Comai et al. 2003; McClintock 1984). Allelic interference, also  
 155 referred to as dominant negative mutation, can result from the formation of non-functional  
 156 homeodimers, while homodimers from the same ancestor continue to function properly. This  
 157 interference effectively reduces the number of active dimers by half (Herskowitz 1987; Veitia  
 158 2007).

### 159 3.1 Epistasis models

160 Let us consider the two locus model, with loci  $B$  and  $C$ . Using the notation of Hill, Goddard  
 161 and Visscher (2008), the phenotype,  $y$ , is modeled as

$$y = B\alpha_B + C\alpha_C + BC\alpha_{BC} \quad (1)$$

162 where  $B$  and  $C$  are the marker allele scores,  $BC$  is the pairwise product of those scores,  $\alpha_B$   
 163 and  $\alpha_C$  are the additive effects of the  $B$  and  $C$  loci and  $\alpha_{BC}$  is the interaction effect.



Table 1: Three types of epistatic interactions for inbred populations for two loci,  $B$  and  $C$ . The Additive  $\times$  Additive and Duplicate factor are adapted from Hill, Goddard and Visscher (2008) with the heterozygous genotypes removed.

| Additive $\times$ Additive                                                                                                                                                                                                                                                                                                                                                                                                                                                                                                                                                                                           | Duplicate Factor     | Subfunctionalization |      |      |      |     |      |     |      |                                                                                                                                                                                                                                                                                                                                                                                                                                                                                                                                                                                                                    |  |      |      |      |     |     |      |     |     |                                                                                                                                                                                                                                                                                                                                                                                                                                                                                                                                                                                                                                               |  |      |      |      |                      |       |      |             |     |
|----------------------------------------------------------------------------------------------------------------------------------------------------------------------------------------------------------------------------------------------------------------------------------------------------------------------------------------------------------------------------------------------------------------------------------------------------------------------------------------------------------------------------------------------------------------------------------------------------------------------|----------------------|----------------------|------|------|------|-----|------|-----|------|--------------------------------------------------------------------------------------------------------------------------------------------------------------------------------------------------------------------------------------------------------------------------------------------------------------------------------------------------------------------------------------------------------------------------------------------------------------------------------------------------------------------------------------------------------------------------------------------------------------------|--|------|------|------|-----|-----|------|-----|-----|-----------------------------------------------------------------------------------------------------------------------------------------------------------------------------------------------------------------------------------------------------------------------------------------------------------------------------------------------------------------------------------------------------------------------------------------------------------------------------------------------------------------------------------------------------------------------------------------------------------------------------------------------|--|------|------|------|----------------------|-------|------|-------------|-----|
| <table style="width: 100%; border-collapse: collapse;"> <tr> <td style="border-right: 1px solid black; padding: 5px;"></td> <td style="padding: 5px;"><math>CC</math></td> <td style="padding: 5px;"><math>cc</math></td> </tr> <tr> <td style="border-right: 1px solid black; padding: 5px;"><math>BB</math></td> <td style="padding: 5px;"><math>2a</math></td> <td style="padding: 5px;"><math>0</math></td> </tr> <tr> <td style="border-right: 1px solid black; padding: 5px;"><math>bb</math></td> <td style="padding: 5px;"><math>0</math></td> <td style="padding: 5px;"><math>2a</math></td> </tr> </table> |                      | $CC$                 | $cc$ | $BB$ | $2a$ | $0$ | $bb$ | $0$ | $2a$ | <table style="width: 100%; border-collapse: collapse;"> <tr> <td style="border-right: 1px solid black; padding: 5px;"></td> <td style="padding: 5px;"><math>CC</math></td> <td style="padding: 5px;"><math>cc</math></td> </tr> <tr> <td style="border-right: 1px solid black; padding: 5px;"><math>BB</math></td> <td style="padding: 5px;"><math>a</math></td> <td style="padding: 5px;"><math>a</math></td> </tr> <tr> <td style="border-right: 1px solid black; padding: 5px;"><math>bb</math></td> <td style="padding: 5px;"><math>a</math></td> <td style="padding: 5px;"><math>0</math></td> </tr> </table> |  | $CC$ | $cc$ | $BB$ | $a$ | $a$ | $bb$ | $a$ | $0$ | <table style="width: 100%; border-collapse: collapse;"> <tr> <td style="border-right: 1px solid black; padding: 5px;"></td> <td style="padding: 5px;"><math>CC</math></td> <td style="padding: 5px;"><math>cc</math></td> </tr> <tr> <td style="border-right: 1px solid black; padding: 5px;"><math>BB</math></td> <td style="padding: 5px;"><math>d(a^* + \tilde{a})</math></td> <td style="padding: 5px;"><math>a^*</math></td> </tr> <tr> <td style="border-right: 1px solid black; padding: 5px;"><math>bb</math></td> <td style="padding: 5px;"><math>\tilde{a}</math></td> <td style="padding: 5px;"><math>0</math></td> </tr> </table> |  | $CC$ | $cc$ | $BB$ | $d(a^* + \tilde{a})$ | $a^*$ | $bb$ | $\tilde{a}$ | $0$ |
|                                                                                                                                                                                                                                                                                                                                                                                                                                                                                                                                                                                                                      | $CC$                 | $cc$                 |      |      |      |     |      |     |      |                                                                                                                                                                                                                                                                                                                                                                                                                                                                                                                                                                                                                    |  |      |      |      |     |     |      |     |     |                                                                                                                                                                                                                                                                                                                                                                                                                                                                                                                                                                                                                                               |  |      |      |      |                      |       |      |             |     |
| $BB$                                                                                                                                                                                                                                                                                                                                                                                                                                                                                                                                                                                                                 | $2a$                 | $0$                  |      |      |      |     |      |     |      |                                                                                                                                                                                                                                                                                                                                                                                                                                                                                                                                                                                                                    |  |      |      |      |     |     |      |     |     |                                                                                                                                                                                                                                                                                                                                                                                                                                                                                                                                                                                                                                               |  |      |      |      |                      |       |      |             |     |
| $bb$                                                                                                                                                                                                                                                                                                                                                                                                                                                                                                                                                                                                                 | $0$                  | $2a$                 |      |      |      |     |      |     |      |                                                                                                                                                                                                                                                                                                                                                                                                                                                                                                                                                                                                                    |  |      |      |      |     |     |      |     |     |                                                                                                                                                                                                                                                                                                                                                                                                                                                                                                                                                                                                                                               |  |      |      |      |                      |       |      |             |     |
|                                                                                                                                                                                                                                                                                                                                                                                                                                                                                                                                                                                                                      | $CC$                 | $cc$                 |      |      |      |     |      |     |      |                                                                                                                                                                                                                                                                                                                                                                                                                                                                                                                                                                                                                    |  |      |      |      |     |     |      |     |     |                                                                                                                                                                                                                                                                                                                                                                                                                                                                                                                                                                                                                                               |  |      |      |      |                      |       |      |             |     |
| $BB$                                                                                                                                                                                                                                                                                                                                                                                                                                                                                                                                                                                                                 | $a$                  | $a$                  |      |      |      |     |      |     |      |                                                                                                                                                                                                                                                                                                                                                                                                                                                                                                                                                                                                                    |  |      |      |      |     |     |      |     |     |                                                                                                                                                                                                                                                                                                                                                                                                                                                                                                                                                                                                                                               |  |      |      |      |                      |       |      |             |     |
| $bb$                                                                                                                                                                                                                                                                                                                                                                                                                                                                                                                                                                                                                 | $a$                  | $0$                  |      |      |      |     |      |     |      |                                                                                                                                                                                                                                                                                                                                                                                                                                                                                                                                                                                                                    |  |      |      |      |     |     |      |     |     |                                                                                                                                                                                                                                                                                                                                                                                                                                                                                                                                                                                                                                               |  |      |      |      |                      |       |      |             |     |
|                                                                                                                                                                                                                                                                                                                                                                                                                                                                                                                                                                                                                      | $CC$                 | $cc$                 |      |      |      |     |      |     |      |                                                                                                                                                                                                                                                                                                                                                                                                                                                                                                                                                                                                                    |  |      |      |      |     |     |      |     |     |                                                                                                                                                                                                                                                                                                                                                                                                                                                                                                                                                                                                                                               |  |      |      |      |                      |       |      |             |     |
| $BB$                                                                                                                                                                                                                                                                                                                                                                                                                                                                                                                                                                                                                 | $d(a^* + \tilde{a})$ | $a^*$                |      |      |      |     |      |     |      |                                                                                                                                                                                                                                                                                                                                                                                                                                                                                                                                                                                                                    |  |      |      |      |     |     |      |     |     |                                                                                                                                                                                                                                                                                                                                                                                                                                                                                                                                                                                                                                               |  |      |      |      |                      |       |      |             |     |
| $bb$                                                                                                                                                                                                                                                                                                                                                                                                                                                                                                                                                                                                                 | $\tilde{a}$          | $0$                  |      |      |      |     |      |     |      |                                                                                                                                                                                                                                                                                                                                                                                                                                                                                                                                                                                                                    |  |      |      |      |     |     |      |     |     |                                                                                                                                                                                                                                                                                                                                                                                                                                                                                                                                                                                                                                               |  |      |      |      |                      |       |      |             |     |

164 We revisit two epistatic models, the “Additive  $\times$  Additive Model without Dominance  
 165 or Interactions Including Dominance” (called Additive  $\times$  Additive hence forth) and the  
 166 “Duplicate Factor” considered by Hill, Goddard and Visscher (2008) that are relevant for  
 167 this discussion. We also propose a generalized Duplicate Factor epistatic model to estimate  
 168 the degree of gene functional redundancy, or subfunctionalization. Letting  $a$  be the effect on  
 169 the phenotype, we can represent these epistatic models for inbreds in Table 1.

170 When markers are coded  $\{0, 1\}$  for presence of the functional allele, the deviation from  
 171 the additive expectation,  $\delta$ , is estimated by  $\alpha\alpha_{BC}$ .  $\delta$  can then be used to calculate the  
 172 subfunctionalization coefficient,  $d = 1 + \frac{\delta}{a^* + \tilde{a}}$  (Figure 2). Omitting the population mean, the  
 173 least squares expectation of additive and epistatic effects is then

$$E \begin{bmatrix} B\alpha_B \\ C\alpha_C \\ BC\alpha_{BC} \end{bmatrix} = \begin{bmatrix} a^* \\ \tilde{a} \\ \delta \end{bmatrix} = \begin{bmatrix} a^* \\ \tilde{a} \\ (d-1)(a^* + \tilde{a}) \end{bmatrix}$$

### 174 3.2 Epistatic contrasts

175 Epistatic interaction predictors must be formed from marker scores in order to estimate  
 176 interaction parameters. These interaction predictors are typically calculated as the pairwise  
 177 product of the genotype scores for their respective loci. This can lead to ambiguity in the  
 178 meaning of those interaction effects depending on how the marker scores are coded. Different  
 179 marker parameterizations can center the problem at different reference points (i.e. different

Table 2: Epistatic interaction tables resulting from  $\{-1, 1\}$  and  $\{0, 1\}$  marker coding for inbreds.

|           |           |           |           |           |           |
|-----------|-----------|-----------|-----------|-----------|-----------|
|           | <i>CC</i> | <i>cc</i> |           | <i>CC</i> | <i>cc</i> |
| <i>BB</i> | 1         | -1        | <i>BB</i> | 1         | 0         |
| <i>bb</i> | -1        | 1         | <i>bb</i> | 0         | 0         |

180 intercepts), and can scale the predictors based on allele or genotype effects (i.e. different  
181 slopes).

182 When loci *B* and *C* are coded as  $\{-1, 1\}$  for inbred genotypes, including the product of the  
183 marker scores, *BC*, corresponds to the Additive  $\times$  Additive model. Changing the reference  
184 allele at either locus does not change the magnitude of effect estimates but will change  
185 their signs. Using  $\{0, 1\}$  coding, *BC* corresponds to the subfunctionalization model and  
186 estimates  $\delta$  directly. For this coding scheme, the magnitude and sign can change depending  
187 on the reference allele at the two loci. This highlights one of the difficulties of effect sign  
188 interpretation, as it is not clear which marker orientations should be paired. That is, which  
189 allele should be *B* as opposed to *b*, and which should be *C* as opposed to *c*? Marker alleles  
190 can be oriented to have either all positive or all negative additive effects, but the question  
191 remains: which direction should the more biologically active allele have on the phenotype?

192 Marker scores are typically assigned as either presence (or absence) of the reference,  
193 major, or minor allele, which may or may not be biologically relevant. While it has been  
194 noted that the two different marker encoding methods do not result in the same contrasts  
195 of genotypic classes (He, Wang, and Parida 2015; Martini et al. 2016; Martini et al. 2017),  
196 coding does not affect the least squares model fit (Zeng, Wang, and Zou 2005; Álvarez-  
197 Castro and Carlborg 2007). Álvarez-Castro and Carlborg (2007) show that there exists a  
198 linear transformation to shift between multiple parameterizations using a change-of-reference  
199 operation (see Appendix A3). This is convenient because all marker orientation combinations  
200 can be easily generated by changing the effect signs of a single marker orientation fit for the  
201  $\{-1, 1\}$  marker coding. These effect estimates can subsequently be transformed to the  $\{0, 1\}$

202 coding effect estimates using the change-of-reference operation for all marker orientation  
203 combinations.

## 204 4 Materials and Methods

### 205 4.1 RIL population

206 A bi-parental recombinant inbred line (RIL) population of 158 lines segregating for two  
207 dwarfing genes was used to illustrate an epistatic interaction between the well known home-  
208 ologous genes on chromosomes 4B and 4D, *Rht-B1* and *Rht-D1*, important in the Green  
209 Revolution. Two genotyping by sequencing (GBS) markers linked to these genes were used  
210 to track the segregating mutant (*b* and *d*) and wildtype (*B* and *D*) alleles. Only one test for  
211 epistasis between these two markers was run. This homeologous marker pair was denoted  
212 RIL\_Rht1. Details of the population can be found in Appendix A1.

### 213 4.2 CNLM population

214 The Cornell small grains soft winter wheat breeding population (CNLM) was used to investi-  
215 gate the importance of homeologous gene interactions in a large adapted breeding population.  
216 The dataset and a detailed description of the CNLM population can be found in Santanto-  
217 nio et al. (2018). Briefly, the dataset consists of 1,447 lines evaluated in 26 environments  
218 around Ithaca, NY. Because the data were collected from a breeding population, only 21% of  
219 the genotype/environment combinations were observed, totaling 8,692 phenotypic records.  
220 Standardized phenotypes of four traits, grain yield (GY), plant height (PH), heading date  
221 (HD) and test weight (TW) were recorded. All lines were genotyped with 11,604 GBS mark-  
222 ers aligned to the International Wheat Genome Sequencing Consortium (IWGSC) RefSeq  
223 v1.0 wheat genome sequence of ‘Chinese Spring’ (IWGSC 2018, accepted), and subsequently  
224 imputed.

### 225 **4.3 Homeologous marker sets**

226 Using the IWGSC RefSeq v1.0 ‘Chinese Spring’ wheat genome sequence (IWGSC 2018,  
227 accepted), homeologous sets of genes were constructed by aligning the annotated coding  
228 sequences (v1.0) back onto themselves. Alignments of coding sequences was accomplished  
229 with BLAST+, allowing up to 10 alignments with an e-value cutoff of 1e-5. Alignments  
230 were only considered if they aligned to 80% or more of the query gene. Of the 110,790  
231 coding sequences, 13,111 triplicate sets with one gene on each homeologous chromosome  
232 (representing 39,333 genes) were identified with no other alignments meeting the criterion.  
233 An additional 5,073 triplicates (representing 15,219 genes) were added by selecting the top  
234 2 alignments if they were on the corresponding homeologous chromosomes. Duplicate sets  
235 were also included if there was not a third alignment to one of the three subgenomes, adding  
236 an additional 5,612 duplicates. The coding sequences for which we did not identify home-  
237 ologous genes either appeared to be singletons (24,695 coding sequences) that did not have  
238 a good alignment to a gene on a homeologous chromosome, or had many alignments across  
239 the genome making it impossible to determine with certainty which alignments were truly  
240 homeologous (20,319 coding sequences). The known 4A, 5A, and 7B translocation in wheat  
241 (Devos et al. 1995) was ignored for simplicity in this study, but could easily be accounted  
242 for by allowing homeologous pairs across these regions.

243 The resulting 23,796 homeologous gene sets, comprised of 18,184 triplicate and 5,612  
244 duplicate gene sets, sampled roughly 59% of the gene space of hexaploid wheat. Each home-  
245 ologous gene was then anchored to the nearest marker by physical distance (Supplementary  
246 Figures S1 and S2), and homeologous sets of markers were constructed from the anchor  
247 markers to each homeologous gene set. Redundant marker sets due to homeologous genes  
248 anchored by the same markers were removed, resulting in 6,142 triplicate and 3,985 duplicate  
249 marker sets for a total of 10,127 unique homeologous marker sets. These marker sets were  
250 then used to calculate marker interactions as pairwise products of the marker score vectors.

251 As a control, two additional marker sets were produced by sampling the same number

252 of duplicate and triplicate marker sets as the homeologous set (Homeo) described above.  
253 These markers sets were sampled either from chromosomes within a subgenome (Within,  
254 e.g. markers on 1A, 2A and 3A), or across non-syntenic chromosomes of different subgen-  
255 omes (Across, e.g. markers on 1A, 2B and 3D). Samples were taken to reflect the same  
256 marker distribution of the Homeo set with regard to their native genome, which has a larger  
257 proportion of D genome markers relative to their abundance. Note that three-way homeolo-  
258 gous interactions have equal proportions of markers belonging to the A, B and D genomes,  
259 whereas D genome markers only account for 13% of all markers in the CNLM population  
260 (Santantonio, Jannink, and Sorrells 2018). All analyses conducted on the Homeo marker  
261 set were conducted on the Within and Across marker sets to determine the importance of  
262 homeologous gene interactions relative to non-homeologous gene interactions.

#### 263 4.4 Determining marker orientation

264 For each homeologous marker set, additive homeologous marker effects and their multiplica-  
265 tive interaction effects were estimated as fixed effects in the following linear mixed model  
266 while correcting for background additive and epistatic effects. The  $\{-1, 1\}$  marker parame-  
267 terization was used for fixed marker additive and interaction effect estimates.

$$\mathbf{y} = \tilde{\mathbf{Z}}\mathbf{S}_{-11}\mathbf{E}_{-11} + \mathbf{X}\boldsymbol{\beta} + \mathbf{Z}\mathbf{g}_{G+I} + \boldsymbol{\varepsilon} \quad (2)$$

268 where  $\mathbf{X}$  is the design matrix,  $\boldsymbol{\beta}$  is the vector of fixed environmental effects, and  $\mathbf{Z}$  is the  
269 line incidence matrix.  $\mathbf{S}_{-11}$  is the matrix of genotype marker scores and interactions for each  
270 genotype class, while  $\mathbf{E}_{-11}$  is the additive and interaction effects that need estimated (Ap-  
271 pendix A3).  $\tilde{\mathbf{Z}}$  is the incidence matrix for the two- or three-way genotype of each homeologous  
272 marker set.  $\mathbf{Z}$  and  $\tilde{\mathbf{Z}}$  differ in that the former links observations to a specific line, whereas the  
273 latter links observations to one of the two- or three-way genotype classes for the homeologous  
274 marker set. The background genetic effects were assumed to be  $\mathbf{g}_{G+I} \sim \mathcal{N}(0, \sigma_G^2\mathbf{K}_G + \sigma_I^2\mathbf{H}_I)$

275 with population parameters previously determined (Zhang et al. 2010). The additive and  
276 epistatic covariances,  $\mathbf{K}_G$  and  $\mathbf{H}_I$ , were calculated as described in Van Raden (2008, method  
277 I) and Martini et al. (2016), respectively. This weighted covariance matrix was used to  
278 reduce computational burden associated with estimating two variance components in the  
279 same fit.

280 A Wald test was used to obtain a p-value for the null hypothesis that the marker effects  
281 or interactions are zero. All marker orientation combinations were generated by changing the  
282 estimated effect signs, and then transformed to the  $\{0, 1\}$  marker effect estimates using the  
283 change-of-reference operation (Álvarez-Castro and Carlborg 2007). Only marker orientations  
284 with all positive or all negative effects were considered.

285 Four marker orientation schemes were used in further analyses. Markers were oriented  
286 to have either all positive (POS) effects, all negative (NEG) effects, or to have the direction  
287 chosen for each marker set by one of two methods. The first method, ‘low additive vari-  
288 ance high additive effect’ (LAVHAE), selected the marker orientation that minimized the  
289 difference (or variance for three-way sets) of the additive main effects while maximizing the  
290 mean of the absolute values of the additive main effects. Only additive effects were used  
291 to select the marker orientation to keep from systematically selecting marker orientations  
292 with a specific interaction pattern for the LAVHAE scheme. A second method was used  
293 to select marker orientations solely based on the highest variance of estimated additive and  
294 interaction effects, denoted ‘high total effect variance’ (HTEV). The HTEV method biases  
295 the interaction term to be in the opposite direction to that of the additive effects, therefore  
296 discussion of results using this method is limited.

## 297 **4.5 Additive only simulated controls**

298 Marker effect and interaction estimates using either  $\{0, 1\}$  or  $\{0, 1\}$  marker parameterizations  
299 are not orthogonal, so care must be taken when interpreting the direction and magnitude of  
300 the effects estimates. The positive covariance between the marker scores and their interaction

301 leads to a multicollinearity problem, and results in a negative relationship between additive  
302 and interaction effects if both additive effects are oriented in the same direction. To determine  
303 if any observed pattern was due entirely to multicollinearity, a new phenotype with no  
304 epistatic effects was simulated from the data for each trait. The estimate of the marker  
305 variance was calculated from the additive genetic variance estimate as  $\hat{\sigma}_m^2 = \hat{\sigma}_G^2(2\mathbf{p}^T(\mathbf{1} -$   
306  $\mathbf{p}))^{-1}$ , where  $\mathbf{p}$  is the vector of marker allele frequencies. Then for each trait, a new additive  
307 phenotype was simulated as  $\mathbf{y}_{sim} = \mathbf{1}\mu + \mathbf{X}\boldsymbol{\beta} + \mathbf{ZM}\mathbf{u}_{sim} + \boldsymbol{\varepsilon}_{sim}$  where  $\mathbf{M}$  is the matrix  
308 of marker scores,  $\mathbf{u}_{sim}$  was sampled from  $\mathcal{N}(0, \hat{\sigma}_m^2)$  and  $\boldsymbol{\varepsilon}$  was sampled from  $\mathcal{N}(0, \hat{\sigma}^2)$ . A  
309 Kolmogorov-Smirnov (KS) test was used to determine if the distribution of the estimated  
310 interaction effects from the actual data differed from the distribution of effects estimated from  
311 simulated data. An additional simulated phenotype was also produced by first permuting  
312 each column of  $\mathbf{M}$  to remove any effects due to LD structure.

## 313 4.6 Genomic prediction

314 To determine the importance of epistatic interactions to the predictability of a genotype, a  
315 genomic prediction model was fit as

$$\mathbf{y} = \mathbf{1}\mu + \mathbf{X}\boldsymbol{\beta} + \mathbf{Z}\mathbf{g}_G + \mathbf{Z}\mathbf{g}_I + \boldsymbol{\varepsilon} \quad (3)$$

316 where  $\mathbf{1}_n$  is a vector of ones,  $\mu$  is the general mean. The random vectors of additive geno-  
317 type, epistatic interactions, and errors were assumed to be distributed as  $\mathbf{g}_G \sim \mathcal{N}(0, \sigma_G^2\mathbf{K})$ ,  
318  $\mathbf{g}_I \sim \mathcal{N}(0, \sigma_I^2\mathbf{H})$  and  $\boldsymbol{\varepsilon} \sim \mathcal{N}(0, \sigma^2)$ , respectively.

319 The additive covariance matrix,  $\mathbf{K}$ , was calculated using Van Raden (2008), method I.  
320 The epistatic covariance matrix  $\mathbf{H}$  was calculated either as defined by Martini et al. (2016) to  
321 model all pairwise epistatic interactions (Pairwise), or in a similar fashion as  $\mathbf{K}$  for oriented  
322 marker sets, where only unique products of marker variables were included instead of the  
323 marker variables. For the latter, the matrix was scaled with the sum of the joint marker

324 variances as  $(2\mathbf{q}^T(\mathbf{1} - \mathbf{q}))^{-1}$ , where  $\mathbf{q}$  is the frequency of individuals containing both the  
325 non-reference marker alleles.

326 A small coefficient of 0.01, was added to the diagonals of the covariance matrix to recover  
327 full rank lost in centering the matrix of scores prior to calculating the covariance. Five-fold  
328 cross validation was performed by randomly assigning individuals to one of five folds for  
329 10 replications. Four folds were used to train the model and predict the fifth fold for all  
330 five combinations. All models were fit to the same sampled folds so that models would  
331 be directly comparable to one another and not subject to sampling differences. Prediction  
332 accuracy was assessed by collecting genetic predictions for all five folds, then calculating the  
333 Pearson correlation coefficient between the predicted genetic values for all individuals and a  
334 “true” genetic value. The “true” genetic values were obtained by fitting a mixed model to  
335 all the data with fixed effects for environments and a random effect for genotypes, assuming  
336 genotype independence with a genetic covariance  $\mathbf{I}$ .

337 Increase in genomic prediction accuracy from the additive model was used as a proxy  
338 to assess the relative importance of oriented marker interaction sets. To determine the  
339 proportion of non-additive genetic signal attributable to each interaction set, the ratio of  
340 the prediction accuracy increase from the additive model using the interaction set (Homeo,  
341 Within and Across) to the prediction accuracy increase from the additive model modeling all  
342 pairwise epistatic interactions (Pairwise) was used for comparison of models. The percentage  
343 of non-additive predictability was calculated as follows for each interaction set.

$$\frac{\text{accuracy(Interaction Set)} - \text{accuracy(Additive)}}{\text{accuracy(Pairwise)} - \text{accuracy(Additive)}} \quad (4)$$

## 344 4.7 Software

345 ASReml-R (Gilmour 1997; Butler 2009) was used to fit all mixed models. BLAST+ (Ca-  
346 macho et al. 2009) was used for coding sequence alignment. All additional computation,  
347 analyses and figures were made using base R (R Core Team 2015) implemented in the Mi-



348 crosoft Open R environment 3.3.2 (Microsoft 2017) unless noted otherwise. Figures 2 and  
349 1 were created using the ‘tikz’ package (Tantau 2018) for L<sup>A</sup>T<sub>E</sub>X. Figure 4 was made with  
350 the ‘circlize’ R package (Gu et al. 2014). The R package ‘xtable’ (Dahl 2016) was used to  
351 generate L<sup>A</sup>T<sub>E</sub>Xtables in R.

## 352 4.8 Data availability

353 Phenotypes and genotypes for the CNLM population can be found in Santantonio et al.  
354 (2018). A list of homeologous genes can be found in supplementary file ‘homeoGeneList.txt’.  
355 The supplementary file ‘HomeoMarkerSet.txt’ contains non-unique marker sets anchored  
356 to each homeologous gene set. Unique marker sets can be found in ‘uniqueHomeoMarker-  
357 Set.txt’, ‘WithinMarkerSet.txt’, ‘AcrossMarkerSet.txt’ for the Homeo, Within and Across  
358 marker sets used in the analysis, respectively. Marker and marker interaction estimates  
359 and p-values for the Homeo set can be found in ‘twoWayInteractions.txt’ and ‘threeWay-  
360 Interactions.txt’ for two- and three-way marker interactions, respectively. Phenotypes and  
361 genotypes used in the RIL population are included in the ‘NY8080Cal.txt’ file.

## 362 5 Results and Discussion

### 363 5.1 *Rht-1*

#### 364 5.1.1 RIL population

365 The markers linked to the *Rht-1B* and *Rht-1D* genes both had significant additive effects ( $p$   
366  $< 10^{-10}$ ) and explained 19.6% and 20.5% of the variation in the height of the RIL population  
367 (Supplemental Table S1). The test for a homeoallelic epistatic interaction between these *Rht-*  
368 *1* linked loci was also significant ( $p = 0.0025$ ), but only explained 3.5% of the variance after  
369 accounting for the additive effects. Had we tested all pairwise marker interactions in this  
370 population, this test would not have passed a Bonferroni corrected significance threshold.

Table 3: Marker and epistatic effect estimates for *Rht-1D* and *Rht-1B* linked GBS markers for plant height (cm) in 158 RIL lines derived from NY91017-8080 × Caledonia. Least squares effect estimates are for markers coded either using  $\{0, 1\}$  coding or  $\{-1, 1\}$ , and then oriented such that the two marker main effects are either both positive (+) or both negative (-)

| Marker Coding | Effect Orientation | Intercept | <i>Rht-1B</i> | <i>Rht-1D</i> | <i>Rht-1B</i> × <i>Rht-1D</i> |
|---------------|--------------------|-----------|---------------|---------------|-------------------------------|
| $\{0, 1\}$    | +                  | 69.9      | 23.4          | 22.2          | -12.2                         |
| $\{0, 1\}$    | -                  | 103.3     | -11.2         | -10.0         | -12.2                         |
| $\{-1, 1\}$   | +                  | 89.7      | 8.6           | 8.0           | -3.0                          |
| $\{-1, 1\}$   | -                  | 89.7      | -8.6          | -8.0          | -3.0                          |

371 Effect estimates for the *Rht-1* markers and their epistatic interaction are shown in Table  
372 3, for  $\{0, 1\}$  and  $\{-1, 1\}$  marker parameterizations, and for orientations where the marker  
373 main effects are both positive or both negative. By plotting these values on a classic epistasis  
374 plot and indicating the genotype class means, it is evident that the  $\{0, 1\}$  parameterization  
375 is arguably more intuitive, as effects correspond directly to differences in genotype values  
376 (Figure 3). They both contain the same information and are equivalent for prediction, but the  
377 interpretation of the  $\{-1, 1\}$  marker coding is less obvious because the slopes are deviations  
378 from the expected double heterozygote, which does not exist in an inbred population. The  
379  $\{0, 1\}$  parameterization uses the double dwarf as the reference point, where the effects  $\alpha_B$   
380 and  $\alpha_C$  are the two semi-dwarf genotypes. The tall genotype is the sum of the semi-dwarf  
381 allele effects plus the deviation coefficient,  $\delta$ , which corresponds to  $\alpha\alpha_{BC}$ .

382 The estimated  $d$  parameter of 0.73 indicates a significant degree of redundancy between  
383 the wild type *Rht-1* homeoalleles. This suggests that either the gene products maintain par-  
384 tial redundancy in function, or the expression of the two homeoalleles is somewhat redundant.  
385 The latter is less likely given that the two functional wild type genes have comparable addi-  
386 tive effects relative to the double dwarf. If the two genes were expressed at different times or  
387 in different tissues based on their native subgenome, the additive effects would be likely to  
388 differ in magnitude. This demonstrates a functional change between homeoalleles that has  
389 been exploited for a specific goal: semi-dwarfism.

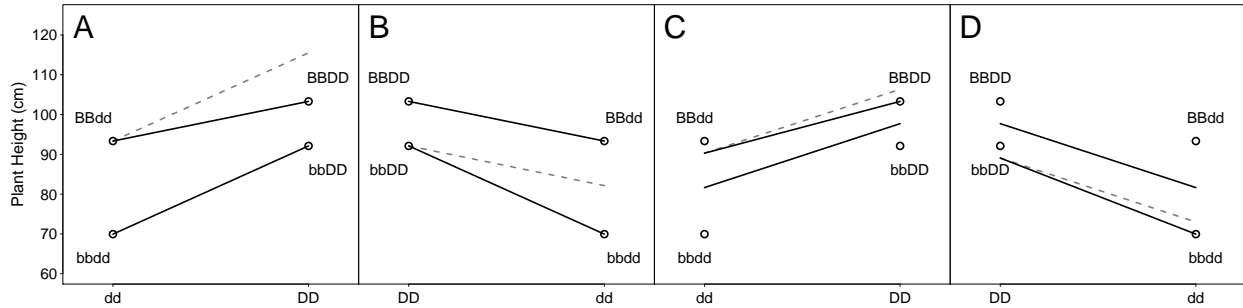

Figure 3: Epistasis plot of effects for *Rht-1B* and *Rht-1D* linked markers on plant height in 158 RIL lines derived from NY91017-8080 × Caledonia. Circles indicate genotype class means, and lines indicate the marker effect slopes. The dotted line indicates the expected slope based on the additive model. A)  $\{0, 1\}$  marker coding with positive marker effect orientation. B)  $\{0, 1\}$  marker coding with negative marker effect orientation. C)  $\{-1, 1\}$  marker coding with positive marker effect orientation, D)  $\{-1, 1\}$  marker coding with negative marker effect orientation.

390 When the markers are oriented in the opposite direction, to indicate the GA insensitive  
391 mutant allele as opposed to the GA sensitive wildtype allele, the interpretation of the in-  
392 teraction effect changes. The additive effect estimates become indicators of the reduction in  
393 height by adding a GA insensitive mutant allele. The interaction effect becomes the addi-  
394 tional height reduction from the additive expectation of having both GA insensitive mutant  
395 alleles, resulting in a  $d$  parameter of 1.58. The same interpretation can be made, but must  
396 be done so with care. Losing wildtype function at both alleles results in a more drastic  
397 reduction in height than expected because there is redundancy in the system. Therefore, the  
398  $d$  parameter is most easily interpreted when the functional direction of the alleles is known.  
399 Simply put, when function is added on top of function, little is gained, but when all function  
400 is removed, catastrophe ensues.

### 401 5.1.2 CNLM population

402 For the CNLM population, the markers with the lowest p-values associated with plant height  
403 on the short arms of 4B and 4D did not show a significant interaction with their respective  
404 assigned homeologous marker in homeologous sets H4.16516 and H4.23244, respectively. A

405 new homeologous marker set, CNLM\_Rht1, was constructed with the SNPs on 4BS and 4DS  
406 with the lowest p-values mentioned above. The additive effects of S4B\_PART1\_38624956 and  
407 S4D\_PART1\_10982050 had p-values of  $p = 5.5 \times 10^{-4}$  and  $p = 3.7 \times 10^{-8}$ , respectively for this  
408 set. The pair was tested for an epistatic interaction, but was only significant at a  $\alpha = 0.05$   
409 threshold ( $p = 0.015$ ). This set was oriented in the same direction as the RIL\_Rht1 set using  
410 the LAVHAE orientation method. While the magnitude of these effects was reduced (7.13,  
411 7.09 and -4.56 for the 4D, 4B and 4B×4D effects respectively), the CNLM\_Rht1 set had a  
412  $d$  parameter value of 0.68, similar to that of RIL\_Rht1. Had this set alone been tested, we  
413 would have concluded that this was a significant homeologous interaction.

414 Based on the p-value, it appears that the S4B\_PART1\_38624956 marker is not in high  
415 LD with the *Rht-1B* gene perhaps due to physical distance, multiple alleles or separation  
416 of these mutations in time. This SNP may have occurred before the *Rht-1B* mutation, and  
417 is therefore flagging both the wild type and a GA-insensitive allele in the population. It  
418 appears that a GBS SNP in high LD with the *Rht-1B* was not sampled, or was filtered out  
419 of the marker set.

420 These results highlight the difficulty in using single SNP markers to track homeologous  
421 regions. If a non-functional mutation that is not in LD with a functional mutation is identified  
422 as the homeologous marker, then there will appear to be no interaction, while a marker in  
423 high LD with the homeolog but physically further away from the gene was missed. Further  
424 research is required to determine if functionally important homeologous marker pairs can be  
425 identified based on LD signatures in the population.

426 One of the challenges of using diverse panels of individuals is that marker proximity  
427 to a functional mutation is not necessarily indicative of high LD between the two sites.  
428 Significantly older or newer marker mutations may be in weak LD with a functional mutation  
429 despite close physical proximity, at least until a genetic bottleneck brings them back into high  
430 LD. The best markers are those mutations in close proximity and occurring at approximately  
431 the same historical time as the functional mutation in the same individual, such that both

432 polymorphisms are subsequently co-inherited.

433 Another strategy to determine functional homeologous regions is to relax which sets  
434 of markers are considered homeologous. This could be accomplished by allowing pairwise  
435 relationships with all markers across entire subgenomes (Santantonio, Jannink, and Sorrells  
436 2018), on syntenic chromosome arms or smaller haplotypes. Haplotypes could be constructed  
437 in the population and used to model homeologous haplotype interactions. This strategy  
438 may have more power assuming the correct SNPs could be identified to assign functional  
439 haplotypes, but that is beyond the scope of this report.

## 440 **5.2 Significant homeoallelic interactions**

441 The absence of one genotype class in 7,912 interaction terms resulted in 20,641 testable in-  
442 teraction effects out of 28,553 total interaction terms. A trait-wise Bonferroni significance  
443 threshold of  $0.05/20,641 = 2.4 \times 10^{-6}$  was therefore used to determine which interaction ef-  
444 fects had a significant effect on the phenotype. Few homeoallelic interactions were significant  
445 at the trait-wise Bonferroni cutoff (Figure 4). Significant homeoallelic interactions for PH  
446 were identified between 4AL and 4DS, as well as 4BL and 4DL. Both of these locations were  
447 likely too far away from the *Rht-1* alleles to be tagging these genes directly, but they may  
448 be regulatory sites for these genes. Another set of interacting sites between the homeologous  
449 chromosome arms 3AS, 3BS and 3DS was also identified for PH, but the additive effects were  
450 not significant. Two interacting regions on homeolog 1, between 1AS and 1DS and between  
451 1AL and 1DL, and three interacting regions on homeolog 5 also appeared to be influencing  
452 HD. One region on the distal end of homeolog 7 affected both HD and TW, with significant  
453 two-way and three-way interactions. Although they were tagged with different marker sets  
454 for the two traits, these epistatic regions appeared to co-localize within 2 Mbp.

455 No significant additive or interaction effects were detected for GY, highlighting the highly  
456 polygenic nature of the grain yield trait. In several cases, one of the additive effects was  
457 significant but the other was not, and it is not clear if this is influencing the detection of

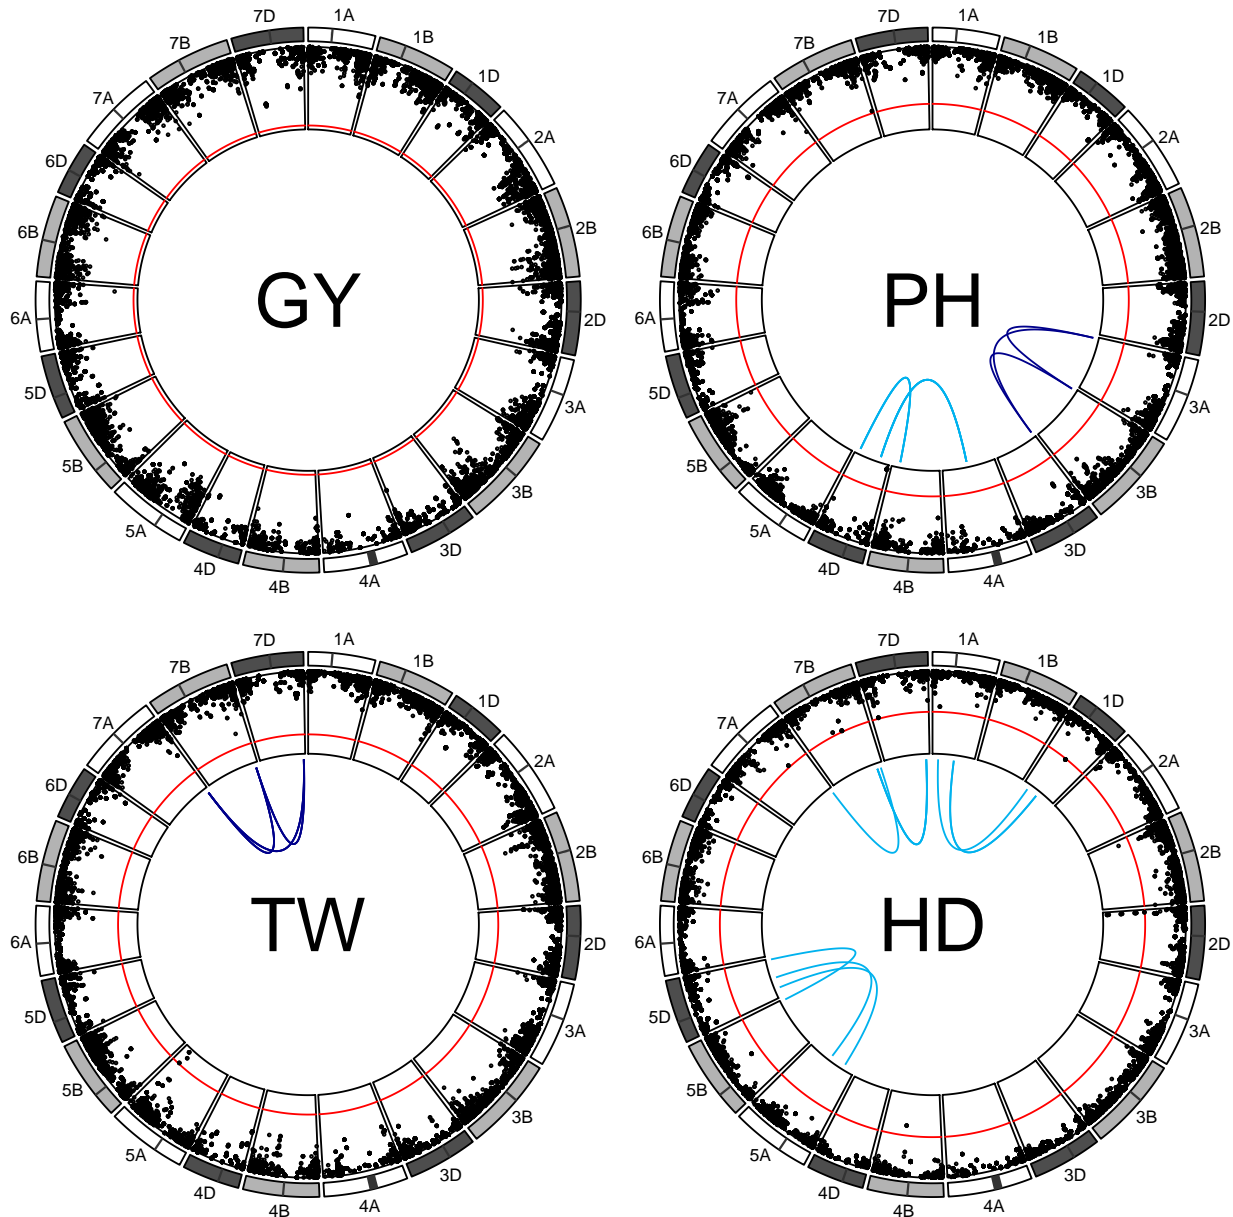

Figure 4: Manhattan plot of homeoallelic marker sets for each of the 21 chromosomes of wheat. The red line indicates a trait wise Bonferroni significance threshold for additive effects of  $-\log_{10}(6.0 \times 10^{-6}) = 5.2$ . Light blue lines indicate significant two-way homeoallelic marker interactions that exceeded a Bonferroni threshold for all testable interaction effects  $-\log_{10}(2.4 \times 10^{-6}) = 5.6$ . Dark blue lines indicate significant 3-way homeoallelic marker interactions that exceeded the same Bonferroni threshold.

458 interactions. It may be that the significant marker is simply in higher LD with the functional  
459 mutation conditional on the presence of the other marker, allowing the interaction to pick  
460 up the additional signal from the functional mutation (Wood et al. 2014). However, if this  
461 were the case, the interaction would be expected to be in the same direction as the additive  
462 effect, which was not generally observed.

463 We did not detect an interaction between the two significant additive regions on 2B  
464 and 2D for the HD trait. While these two markers were not grouped as a homeologous  
465 set, they were tested as such based on their proximity to the well described Photoperiod-1  
466 genes, *Ppd-B1* and *Ppd-D1*, on chromosomes 2B and 2D respectively. These genes are known  
467 to influence photoperiod sensitivity, and therefore transition to flowering and heading date  
468 (Welsh J.R. and R.D. 1973; Law, Sutka, and Worland 1978; Scarth and Law 1983). Certain  
469 allele pairs at these genes have been shown to exhibit a high degree of epistasis (Poland  
470 2018, personal communication) in a bi-parental family. It is unclear why no interaction was  
471 observed in this population.

472 Jiang et al. (2017) also investigated the presence of homeologous interactions, but found  
473 little evidence in a large population of hybrid wheat. They did not attempt to tag homeol-  
474 ogous loci, but instead considered interactions across any markers on homeologous chromo-  
475 somes to be syntenic. It is possible that interactions at homologous (i.e. heterozygous) loci  
476 largely outweighed the interactions across homeologous loci in that population, given it was  
477 constructed from highly divergent parents and that progeny were not inbred. Additionally,  
478 they tested all pairwise marker combinations, resulting in a strict significance threshold that  
479 may have missed small effect homeologous interactions.

480 Homeologous interactions make up relatively few of the potential two-way interactions  
481 within an allopolyploid genome. Given a subgenome with  $k$  genes and alloploidy level  $p$   
482 (i.e. the number of subgenomes), there are  $k\binom{p}{2}$  two-way homeologous interactions versus  
483  $\binom{k}{2} - k\binom{p}{2}$  potential two-way non-homeologous gene interactions. For a subgenome size of  
484 30,000 genes, this represents 0.02% and 0.006% of the possible two-way gene interactions



Table 4: Estimates of  $d$  coefficients for marker sets where both additive and the two-way interaction effects were significant at  $p < 0.05$ , combined for all 4 traits. The expected number of non-zero additive and two-way interactions effects based on a 0.05 significance threshold by chance is 11 (i.e. 4 traits  $\times$  22,411 two-way interactions  $\times$  0.05<sup>3</sup>). Coefficients have been grouped by categories related to the potential mode of epistasis, where  $d < 0.5$  indicates a highly negative interaction,  $0.5 \leq d < 1$  a less than additive interaction may be indicative of subfunctionalization for homeologous genes, and  $d > 1$  which indicates positive, or greater than additive, epistasis. Three marker sets are shown, either across all homeologous loci (Homeo), sampled sets within (Within) and across (Across) non-syntenic subgenome regions. An additional phenotype was simulated to contain additive only phenotypes to contain no epistasis, and fit with the Homeo marker set (Simulated Additive).

| Marker Set         | $d < 0.5$ | $0.5 \leq d < 1$ | $d > 1$ | Total |
|--------------------|-----------|------------------|---------|-------|
| Homeo              | 8         | 14               | 8       | 30*** |
| Simulated Additive | 1         | 1                | 4       | 6     |
| Across             | 9         | 7                | 1       | 17*   |
| Within             | 6         | 3                | 4       | 13    |

\*, \*\*, \*\*\* indicate significantly greater than the expected number of significant sets at  $p = 0.05$ , 0.01 and  $10^{-6}$  based the binomial distribution with 89,644 trials and a probability of 0.05<sup>3</sup>.

485 for an allotetraploid and an allohexaploid, respectively. That said, homeoallelic interactions  
486 should be far more likely to have a true biological interaction than random pairs of genes  
487 because they should belong to the same or similar biochemical pathways.

### 488 5.3 Estimates of $d$

489 There were few cases where at least two additive effects and their corresponding interaction  
490 effect were all significantly different from zero. This may be due to the difficulty of assigning  
491 functional homeologous gene sets using single SNPs, as well as a lack of statistical power  
492 owing to low minor allele frequencies (Hill, Goddard, and Visscher 2008). The lack of a large  
493 number of significant interactions is not surprising given that allele frequencies near 0.5 are  
494 uncommon in both natural and breeding populations.

495 To determine whether more homeologous marker sets were displaying a pattern indicative  
496 of subfunctionalization than would be expected by chance, marker sets where both additive  
497 and two-way interaction effects were significant at a threshold of  $\alpha = 0.05$  were examined



498 (Table 4). The expected number of two-way marker sets with significant additive and in-  
499 teraction effects is about 11 (i.e. 4 traits  $\times$  22,411 two-way interactions  $\times$  0.05<sup>3</sup>), assuming  
500 independence of loci and true additive and interaction effects of zero. Only the Homeo and  
501 Across marker sets had more than the expected number. The homeologous marker set had  
502 a larger proportion of  $d$  coefficients estimated between 0.5 and 1 relative to the strictly ad-  
503 ditive simulated phenotypes as well as the other non-homeologous marker sets, suggesting  
504 that homeologous loci exhibit a pattern indicative of subfunctionalization more so than other  
505 marker sets tested. The Across set showed the highest proportion of  $d < 0.5$ , suggestive of  
506 gene pathway interference. However, it is unclear if these few marker sets are indicative of  
507 any global pattern, and may simply be an artifact of sampling.

508 Because the power to detect significant effects diminishes as more tests are accomplished,  
509 it may be prudent to look at global trends between homeologous additive effects and their  
510 interactions, regardless of statistical significance.

## 511 **5.4 Evidence of subfunctionalization**

512 A strong negative relationship between additive and interaction effects was observed when  
513 using the  $\{0, 1\}$  marker parameterization (Supplementary Figure S3). This negative relation-  
514 ship was also observed in the phenotypes simulated to be strictly additive (Supplementary  
515 Figure S4). The multicollinearity of the additive and epistatic predictors at least partially  
516 drives this relationship, where positively correlated additive and epistatic predictors will tend  
517 to have effect estimates in opposing directions.

518 To determine if the interaction effects were greater in magnitude than expected by chance,  
519 the ordered interaction effects from the true and simulated phenotypes were plotted against  
520 one another to form a quantile-quantile plot (Figure 5). The interaction effects were mul-  
521 tiplied by the sign of the corresponding additive effects to highlight the direction of inter-  
522 action effect relative to the additive effect. Interaction effect distributions were significantly  
523 different between the observed and strictly additive simulated data as determined by the

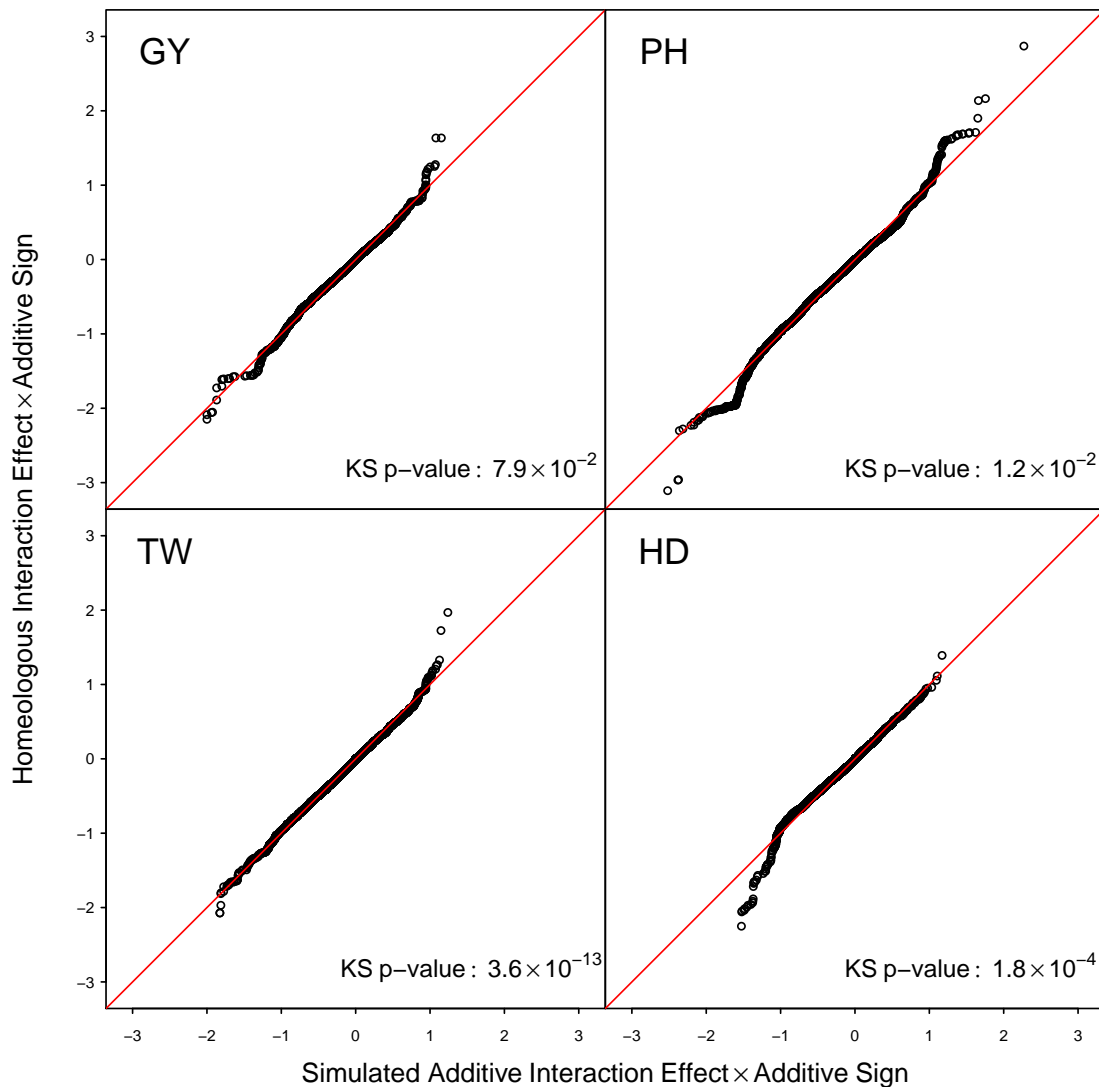

Figure 5: Quantile quantile plot of the ordered estimated homeologous interaction effects plotted against those from a simulated phenotype sampled to obtain no epistatic interactions. Interaction effects have been multiplied by the effect sign of the corresponding additive effects to emphasize the relationship between the additive and interaction effects. The p-value from a Kolmogorov-Smirnov (KS) test is reported to determine if the sampled effect estimate distribution is different from that of the effect distribution estimated from the actual data. A deviation below the line on the bottom left of each graph (i.e. a low dropping tail) should indicate a less than additive epistatic pattern of subfunctionalization, whereas a deviation above the line in the upper right (i.e. a high rising head) should indicate a greater than additive epistasis pattern of homeologous overdominance.

524 Kolmogorov-Smirnov test (KS;  $p < 0.05$ ) for all traits except GY.

525 HD showed a pattern consistent with a subfunctionalization model, with a low dropping  
526 tail for interaction effects in the opposite direction than that of the corresponding additive  
527 effects. This indicates that the less than additive effects of some estimated interactions are  
528 greater than expected by additivity alone. PH showed some evidence of this pattern, but  
529 also demonstrated a greater than additive effect for positively related interaction effects. The  
530 LAVHAE orientation scheme may have selected the wrong marker coding for those marker  
531 sets, resulting in a  $d$  parameter greater than 1, or there are true greater than additive interac-  
532 tion responses for positive effect alleles. Greater than additive responses would be indicative  
533 of overdominance across homeologous loci. GY and TW showed little evidence of the less  
534 than additive pattern, yet TW did show this trend when the HTEV marker orientation was  
535 used (Supplemental Figures S6 and S7). These relationships were more pronounced when  
536 the markers were permuted to remove LD before simulating the data (Supplemental Figure  
537 S5). High LD between homeologous marker sets may result in dampening of the epistatic  
538 signal due to unbalanced or missing genotype classes.

539 These findings are further supported by comparing the homeologous interactions to the  
540 Within and Across interaction effect estimates. The Homeo marker set showed more severe  
541 less than additive epistasis than both Within and Across for HD but not the other traits  
542 (Supplementary Figures S8 and S9). The Within set had more severe less than additive  
543 interaction effects than the Homeo set for TW (Supplementary Figure S8), and the Across  
544 had more severe less than additive effects for PH (Supplementary Figure S9). Large or  
545 moderate effect negative epistasis is expected across subgenomes in allopolyploids, but it is  
546 unclear why this was also observed for the Within marker set for TW.

## 547 **5.5 Homeologous model fit**

548 Comparing variance component estimates across different unstructured covariance matrices  
549 can be misleading as variance components can be scaled by pulling a constant out of the

Table 5: Mixed model REML fit summaries of one additive and four epistasis models for four traits (GY, PH, TW and HD) in the CNLM population based on the  $\{-1, 1\}$  marker parameterization using the LAVHAE marker orientation. Plot level heritabilities assuming genotype independence (i.i.d.) for each trait are shown underneath each trait name.

| Trait |                   | Additive                                | Pairwise      | Homeo                        | Within                        | Across                        |
|-------|-------------------|-----------------------------------------|---------------|------------------------------|-------------------------------|-------------------------------|
| GY    | $\log\mathcal{L}$ | -48                                     | -43           | -42                          | -26                           | -23                           |
| $h^2$ | parameters        | 28                                      | 29            | 29                           | 29                            | 29                            |
| 0.30  | AIC               | 153                                     | 144           | 141                          | 110                           | 104                           |
|       | G                 | 0.268 <sup>a</sup> (12.59) <sup>b</sup> | 0.203 (7.86)  | 0.204 (8.49)                 | 0.133 (5.93)                  | 0.13 (5.84)                   |
|       | H                 |                                         | 0.018 (3.04)  | 0.046 (3.29) <sup>***</sup>  | 0.093 (5.64) <sup>****</sup>  | 0.093 (5.77) <sup>****</sup>  |
|       | R                 | 0.324 (61.86) <sup>c</sup>              | 0.322 (61.39) | 0.323 (61.68)                | 0.321 (61.7)                  | 0.321 (61.7)                  |
| PH    | $\log\mathcal{L}$ | 2237                                    | 2360          | 2314                         | 2367                          | 2374                          |
| $h^2$ | parameters        | 26                                      | 27            | 27                           | 27                            | 27                            |
| 0.73  | AIC               | -4423                                   | -4665         | -4574                        | -4680                         | -4694                         |
|       | G                 | 3.823 (20.75)                           | 0.889 (6.46)  | 1.882 (11.66)                | 0.986 (7.35)                  | 1.046 (7.81)                  |
|       | H                 |                                         | 0.478 (11.95) | 0.914 (8.72) <sup>****</sup> | 1.277 (11.67) <sup>****</sup> | 1.253 (11.62) <sup>****</sup> |
|       | R                 | 0.135 (56.17)                           | 0.132 (56.5)  | 0.133 (56.34)                | 0.133 (56.45)                 | 0.133 (56.5)                  |
| HD    | $\log\mathcal{L}$ | 6343                                    | 6432          | 6404                         | 6425                          | 6444                          |
| $h^2$ | parameters        | 27                                      | 28            | 28                           | 28                            | 28                            |
| 0.53  | AIC               | -12631                                  | -12808        | -12751                       | -12794                        | -12831                        |
|       | G                 | 3.9 (21.16)                             | 1.121 (7.3)   | 2.019 (12.03)                | 1.483 (9.25)                  | 1.212 (8.29)                  |
|       | H                 |                                         | 0.451 (11.13) | 0.857 (8.26) <sup>****</sup> | 1.091 (10.01) <sup>****</sup> | 1.202 (10.97) <sup>****</sup> |
|       | R                 | 0.054 (58.76)                           | 0.053 (58.98) | 0.053 (58.88)                | 0.053 (58.93)                 | 0.053 (58.96)                 |
| TW    | $\log\mathcal{L}$ | 1547                                    | 1630          | 1608                         | 1641                          | 1632                          |
| $h^2$ | parameters        | 28                                      | 29            | 29                           | 29                            | 29                            |
| 0.79  | AIC               | -3037                                   | -3203         | -3159                        | -3224                         | -3205                         |
|       | G                 | 1.067 (16.66)                           | 0.194 (4.47)  | 0.442 (8.35)                 | 0.212 (4.81)                  | 0.221 (4.79)                  |
|       | H                 |                                         | 0.184 (11.33) | 0.346 (8.39) <sup>****</sup> | 0.473 (10.95) <sup>****</sup> | 0.473 (10.66) <sup>****</sup> |
|       | R                 | 0.2 (60.12)                             | 0.195 (60.25) | 0.198 (60.24)                | 0.197 (60.35)                 | 0.197 (60.31)                 |

<sup>a</sup>Variance component estimates reported for additive main effects (G) and epistatic interactions (H) are the ratios of the actual variance component to the residual variance component for ease of comparison.

<sup>b</sup>The variance component divided by their respective standard errors are shown in parentheses.

<sup>c</sup>The residual variance components, R, are the actual estimates from the centered and scaled data (refer to Santantonio et al. (2018) for scaling coefficients).

\*, \*\*, \*\*\*, \*\*\*\* denote p-values of  $p < 0.05$ ,  $p < 0.01$ ,  $p < 0.001$ ,  $p < 10^{-6}$ , respectively for the likelihood ratio test to determine if the epistatic variance component is zero.

550 covariance matrix. Additionally, variance partitioning is only reliable when the covariance  
551 matrices are truly independent (Vitezica et al. 2017; Huang and Mackay 2016; Jiang et  
552 al. 2017). Therefore, we do not make an attempt to discern meaning from the variance  
553 components *per se*, and instead focus the discussion on model fit diagnostics, as well as  
554 prediction accuracy from cross validation to determine the value of the predictive information  
555 included in the model.

556 All epistatic models using the  $\{-1, 1\}$  marker parameterization provided a superior fit  
557 to the additive only model based on Akaike's Information Criterion for all traits (Table 5).  
558 These results were confirmed by a likelihood ratio test to determine if the epistatic variance  
559 component was zero for all traits. With the exception of the GY trait, all of the epistatic

560 models using the  $\{0, 1\}$  marker parameterization also had non-zero variance components  
561 (Supplementary Table S3), but did not result in a better fit for any models or traits. All  
562 LAVHAE oriented marker sets had a better model fit than forcing allele effects to be either all  
563 positive (POS) or all negative (NEG), demonstrating that some information was gained from  
564 orienting markers (Supplementary Tables S4 and S5). The LAVHAE also resulted in a better  
565 model fit than the HTEV marker orientation scheme under either marker parameterization  
566 (Supplementary Tables S6 and S7).

567 Despite resulting in a better fit, adding the epistatic interactions resulted in rather high  
568 correlations between additive and epistatic variance component estimates, as obtained from  
569 the average information matrix. Variance parameter estimate correlations between the ad-  
570 ditive and epistatic interactions consistently ranged from 0.57 to 0.65 for Pairwise, Within  
571 and Across models, but were notably lower for the Homeo epistatic set, ranging from 0.53 to  
572 0.57. High correlations of variance estimates have been shown to be indicative of over fitting  
573 (Bates et al. 2015a; Bates et al. 2015b). However, if addition of epistatic interactions im-  
574 proves prediction accuracy of cross-validation, then the additional information they contain  
575 is warranted for inclusion in the model.

576 The Pairwise, Within and Across epistatic models outperformed the Homeo marker in-  
577 teraction set for all traits. This may be due to poor assignment of homeologous sets, or  
578 relatively fewer identifiable interactions and is discussed later (Section 5.7).

## 579 **5.6 Genomic prediction**

580 All epistatic models resulted in higher prediction accuracies for all traits other than GY,  
581 where only marginal increases were seen for certain marker interaction sets and parameteri-  
582 zations (Table 6).

583 The  $\{-1, 1\}$  marker coding resulted in higher prediction accuracies with a mean increase  
584 of 0.045 over the  $\{0, 1\}$  coding, and ranged from 0.007 to 0.084 higher accuracy. This increase  
585 may be due to choosing the wrong orientation using the  $\{0, 1\}$  marker coding effects. While

586 these two codings are equivalent for prediction using ordinary least squares, this does not  
587 appear to be the case for the mixed model genomic prediction environment. The discrepancy  
588 may lie in shrinkage of interaction effects, where the  $\{0, 1\}$  marker coding should result in  
589 greater shrinkage than the  $\{-1, 1\}$  marker coding. This can be seen from a simple example  
590 with one observation of each genotypic class in  $\{bbcc, bbCC, BBcc, BBCC\}$ . The  $\{-1, 1\}$   
591 coding would have an interaction predictor of  $\{1, -1, -1, 1\}$ , whereas the  $\{0, 1\}$  coding would  
592 have an interaction predictor of  $\{0, 0, 0, 1\}$ . This results in different numbers of observations  
593 per interaction class, with the  $\{0, 1\}$  coding contrasting 3 and 1, versus 2 and 2 for the  
594  $\{-1, 1\}$  coding. Therefore the shrinkage of the  $\{0, 1\}$  coding should be greater than for the  
595  $\{-1, 1\}$  coding. Martini et al. (2017), also noted that the  $\{-1, 1\}$  marker coding has a 50%  
596 chance of choosing the wrong marker orientation if chosen at random, whereas the  $\{0, 1\}$   
597 marker coding has a 75% chance of being the wrong marker orientation.

598 Choosing the marker orientation based on the LAVHAE scheme was better for all traits  
599 and marker sets for the  $\{-1, 1\}$  coding, with a mean prediction accuracy increase of 0.025  
600 (ranging from 0.004 to 0.053) over the all positive (POS) or all negative (NEG) orientations  
601 (Supplemental Tables S8 and S9). Choosing the orientation had little to no effect on the  
602  $\{0, 1\}$  marker coding (mean 0.003, ranging from -0.002 to 0.011). It is unclear if our attempt  
603 to choose the marker orientation resulted in the biologically relevant orientation more often  
604 than would be expected by chance, as this resulted in higher accuracies for the  $\{-1, 1\}$  but  
605 not the  $\{0, 1\}$  marker coding.

606 The increase in genomic prediction accuracy by choosing the orientation using the LAVHAE  
607 scheme over the all positive (POS) or all negative (NEG) scheme suggests that information  
608 can be gained from orienting markers relative to one another (Supplementary Tables S9 and  
609 S8). This is further supported by a better model fit for the LAVHAE orientation. However,  
610 it is unclear what strategy should be used to orient pairs of markers. In this report, marker  
611 additive effects were forced to be either all positive or all negative to model the homeologous  
612 subfunctionalization hypothesis, but there may be more biologically relevant orientations

Table 6: Prediction accuracies of whole genome Additive and Pairwise epistasis, along with the Homeo, Within and Across genome marker sets for both  $\{-1, 1\}$  and  $\{0, 1\}$  marker coding using the LAVHAE marker orientation. The percentage of the non additive genetic predictability as relative to the the Pairwise model is shown in parentheses (equation 4).

| LAVHAE | Additive           | Pairwise | Homeo <sub>-11</sub> | Homeo <sub>01</sub> | Within <sub>-11</sub> | Within <sub>01</sub> | Across <sub>-11</sub> | Across <sub>01</sub> |
|--------|--------------------|----------|----------------------|---------------------|-----------------------|----------------------|-----------------------|----------------------|
| GY     | 0.601 <sup>a</sup> | 0.604    | 0.606 (167%)         | 0.599 (-67%)        | 0.627 (867%)          | 0.600 (-33%)         | 0.630 (967%)          | 0.604 (100%)         |
| PH     | 0.559              | 0.637    | 0.606 (60%)          | 0.580 (27%)         | 0.652 (119%)          | 0.570 (14%)          | 0.650 (117%)          | 0.584 (32%)          |
| TW     | 0.515              | 0.576    | 0.560 (74%)          | 0.516 (2%)          | 0.596 (133%)          | 0.514 (-2%)          | 0.581 (108%)          | 0.525 (16%)          |
| HD     | 0.664              | 0.712    | 0.692 (58%)          | 0.682 (38%)         | 0.710 (96%)           | 0.674 (21%)          | 0.722 (121%)          | 0.682 (38%)          |

<sup>a</sup> Mean Pearson correlation between predicted and observed genetic values across 10 random 5-fold cross-validation replications.

613 not explored here. Martini et al. (2017) used a categorical interaction that included a pre-  
614 dictor for each pairwise genotype. That model was shown to be less predictive than the  
615  $\{-1, 1\}$  multiplicative model, perhaps due to more linearly dependent predictors assumed to  
616 have non-zero effects. How an optimal set of orientations might be obtained without losing  
617 biological meaning of the orientation warrants further investigation.

618 An indirect estimate of the proportion of non-additive genetic signal attributable to  
619 homeologous gene interaction was determined by taking the ratio of the percent increase in  
620 prediction accuracy of the Homeo, Within or Across prediction models from the additive  
621 model to the increase in prediction accuracy due to all pairwise interactions (equation 4).  
622 All three marker sets resulted in higher genomic prediction accuracy than the additive only  
623 GBLUP model ( $G$ ) when the  $\{-1, 1\}$  marker coding was used. The homeologous marker  
624 interaction set explained between 58% and 167% of the additional genetic signal from the  
625 additive model. This result supports the idea that homeologous interactions are an important  
626 feature in the wheat genome. Conversely, Within and Across epistatic marker sets always  
627 resulted in a higher increase in genomic prediction accuracy relative to the Homeo marker  
628 set for all traits. This may suggest that the homeologous marker interactions are the least  
629 important relative to other epistatic interactions within and across the subgenomes, but could  
630 also be due to the paucity of these interactions relative to all possible two-way interactions,  
631 as previously discussed.

632 Another explanation might be provided by the relatively higher degree of LD across  
633 Homeo marker sets than found for the Within or Across marker sets. The Within and  
634 Across marker interaction sets also resulted in a larger number of unique interaction pre-  
635 dictors because they were randomly selected across chromosomes. Homeologous marker sets  
636 were selected next to one another along syntenic regions of homeologous chromosome, and  
637 more often shared two of the three homeoallelic markers (Supplemental Figure S11). The  
638 Within and Across sets appear to have sampled the entire genome better than selecting only  
639 homeologous loci, as they track more unique pairs of genomic regions.



## 640 5.7 Homeologous LD

641 The superiority of the Within and Across genomic prediction models to the Homeo genomic  
642 prediction model may indicate that homeologous interactions are relatively less important  
643 than other sets of interacting loci. However, homeologous marker sets had a much higher  
644 tendency to be co-inherited together, as seen by relatively higher standardized linkage dise-  
645 quilibrium values,  $D'$  (Lewontin 1964), than observed for either Within (KS test p-value =  
646  $1.1 \times 10^{-6}$ ) or Across (KS test p-value =  $2.3 \times 10^{-13}$ ) marker sets (Figure S10). The greater  
647 fixation of allele pairs at homeologous regions may explain the lack of increased prediction  
648 accuracy of the Homeo marker set, but this may not diminish the importance of homeologous  
649 interactions. As sets of interactions are fixed within the population, the epistatic variance  
650 becomes additive (Hill, Goddard, and Visscher 2008). The higher degree of LD, *per se*, may  
651 indicate the importance of homeologous interactions.

652 The Green Revolution dwarfing genes are an excellent example of how pairs of homeoal-  
653 leles may become fixed, or develop a tendency for co-inheritance under selection. In this  
654 example, the desirable phenotype is a semi-dwarf, due to its resistance to lodging. There-  
655 fore, wildtype *Rht-1B* alleles will usually be paired with a GA-insensitive *Rht-1D* dwarfing  
656 allele, while wildtype *Rht-1D* alleles will usually be found with a GA-insensitive *Rht-1B*  
657 dwarfing allele to confer the desirable semi-dwarf phenotype. The CNLM\_Rht1 set had a  
658 large standardized  $D'$  value of 0.66, indicating that pairs of alleles were being fixed in the  
659 population, despite the apparent lack of high LD between the B genome marker and the  
660 *Rht-1B* gene.

661 We recognize that it is also possible that the higher degree of LD observed between  
662 homeologous marker pairs could be due to misalignment of markers to the wrong subgenome.  
663 Markers assigned to the wrong homeolog would appear in high LD simply because they are  
664 physically located near their assigned homeologous partner on the same chromosome. We  
665 used strict filtering parameters to reduce the likelihood of misalignment. This included a  
666 threshold on observed heterozygosity in the population, which could indicate alignment to

667 more than one subgenome.

## 668 **5.8 Conclusion**

669 While much epistasis is partitioned to additive variance, it has been shown to be prevalent  
670 (Forsberg et al. 2017), and is important for maintaining long term selection (Carlborg et al.  
671 2006; Paixão and Barton 2016). Our results indicate that homeoallelic interactions do not  
672 account for a large portion of the non-additive genetic variance in the CNLM population.  
673 While they do contribute to the genetic variance of the population as evidenced by a better  
674 model fit and higher prediction accuracy over the additive model, sampling interactions  
675 across non-syntenic regions was superior for all traits examined. Homeologous interactions  
676 appear to make up the minority of epistatic interactions within this population.

677 Wagner (2005) suggested that there are two potential drivers of less than additive (Eshed  
678 and Zamir 1996) or synergistic (Segre et al. 2005) epistasis. These drivers are i) functional  
679 redundancy, as might be expected across homeologous loci, and ii) distributed robustness of  
680 function, in which there can be are many pathways that can acheive the same outcome. Our  
681 observation that most epistasis is not due to homeologous interactions is supported by the  
682 findings of Jannink et al. (2009), who found the synergistic epistasis signal in a wheat dataset  
683 to be indicative of Wagner’s distributed hypothesis, and not of the redundancy hypothesis.

684 HD showed the greatest evidence of subfunctionalization. The LAVHAE orientation  
685 appeared to be effective for the HD trait, but it is unclear if this marker orientation scheme  
686 was effective for PH, which also demonstrated a greater than additive effect. TW showed  
687 little pattern of subfunctionalization, despite having significant epistatic interactions. GY  
688 showed no evidence of being affected which may be due to the highly polygenic nature of  
689 the trait. Essentially all functional differences in the population should contribute to GY,  
690 and it may be that the effects of epistatic interactions are too small to detect. Large effect  
691 homeologous interactions for GY are likely to have allele pairs that have been fixed or are  
692 well on their way to fixation in the elite wheat genotypes as a consequence of modern plant

693 breeding. The fixation of the semi-dwarf phenotype provides a profound example where  
694 specific pairs of homeoalleles result in drastic increases in grain production under modern  
695 agriculture.

696 The apparent lack of substantial interactions across homeoallelic loci may be explained  
697 by several factors. It may be that there are few differences in protein function or expression  
698 across the three subgenomes, although this seems unlikely given mounting evidence that  
699 homeologous copies are differentially expressed in time, tissue and environment (Adams et  
700 al. 2003; Liu and Adams 2007; Liu, Baute, and Adams 2011; Chaudhary et al. 2009; Pfeifer  
701 et al. 2014; Liu et al. 2015; Mutti, Bhullar, and Gill 2017; Zhang et al. 2016). We were  
702 unable to assign homeologous pairs to all genes within the genome, suggesting that many  
703 of these potential sites for interacting loci were lost during polyploidization. Rapid loss of  
704 genetic material due to genome shock (McClintock 1984) is common in newly synthesized  
705 allopolyploids (Chen and Ni 2006), as has been shown in synthetic allopolyploid wheat  
706 (Ozkan, Levy, and Feldman 2001; Kashkush, Feldman, and Levy 2002). Other interacting  
707 loci may have undergone epigenetic (Comai 2000; Lee and Chen 2001; Comai et al. 2003)  
708 or transposon induced silencing of one or more homeoalleles (Kashkush, Feldman, and Levy  
709 2003; Wang et al. 2004).

710 It may also be that the most important homeoallele pairs have been effectively fixed in  
711 the CNLM breeding population, as evidenced by a higher degree of LD between homeol-  
712 ogous markers compared to markers sampled from non-homeologous regions. Determining  
713 homeologous regions is relatively simple using gene positions and orientation, but tagging  
714 those regions with markers that are informative of interacting loci appears to be a challenge,  
715 even for well known loci such as *Rht-1*. Marker imputation using a diverse panel of highly  
716 sequenced individuals may increase the marker density and the ability to identify interact-  
717 ing loci. As sequencing becomes more affordable, higher read coverage will allow for better  
718 genotyping, and should produce more high quality markers. Other approaches, such as the  
719 use of haplotypes, should be developed to assign informative homeologous locus indicators,

720 as opposed to simply using physical position of markers or lumping markers on the same  
721 subgenome together (Santantonio, Jannink, and Sorrells 2018).

722 The TILLING population developed by Kasileva et al. (2017) consisting of 2,735 mu-  
723 tant lines each with thousands of genic mutations could be a useful resource for future  
724 investigation into homeoallelic gene interactions. Lines with complementary loss of function  
725 homeologous genes could be used to develop bi-parental mapping populations to test the  
726 degree of subfunctionalization with the high statistical power afforded by allele frequencies  
727 of 0.5.

728 Other genetic resources also exist that would maximize the likelihood of detecting these  
729 interactions. A segregating synthetic hexaploid wheat population was developed from a cross  
730 between a spring wheat variety, Opata, and a synthetic hexaploid, W7984, with durum A  
731 and B genomes coupled to an *Ae. taushii* D genome (Sorrells et al. 2011). The population,  
732 consisting of roughly 200 doubled haploid and over 2,000 recombinant inbred lines, will have  
733 high statistical power to detect interactions between the common wheat homeologs and their  
734 durum and *Ae. taushii* ancestors due to both optimal allele frequencies and high genetic  
735 differences.

736 Prediction of unobserved beneficial homeoallelic epistatic regions may prove difficult, as it  
737 currently is in diploid hybrids. Additionally, directed selection for homeoallelic interactions  
738 across subgenomes will be challenging in autogamous allopolyploids due to the intensive  
739 labor involved in making crosses. However, these tools provide a way to screen large pop-  
740 ulations for beneficial homeologous interactions such that they may in turn be selected in  
741 breeding populations before intensive field trials are conducted, saving phenotyping costs  
742 and potentially reducing the time to variety release.

743 Treating the genome as consisting of purely additive gene action assumes that genes  
744 are independent machines, whose products sum to the final value of an individual. While  
745 convenient for selection, this is almost certainly not true when we consider the molecular  
746 mechanisms of biological organisms. Instead, genes work in concert to produce an observable

747 phenotype. To this day, breeders of allopolyploid crops have treated allopolyploids as diploids  
748 for simplicity, but we now have the technical ability to view and start to breed these organisms  
749 as the ancient immortal hybrids that they are.

## 750 **6 Acknowledgments**

751 Funding of this research was provided by the USDA National Needs Fellowship for N. San-  
752 tantonio, in partial fulfillment of the requirements for a Ph.D in Plant Breeding and Genetics  
753 at Cornell University. The field trials comprising the phenotypic data for the CNLM pop-  
754 ulation were funded in part by the Hatch Project # 149-447. Genotyping was funded by  
755 the Wheat Coordinated Agricultural Project (WheatCAP). We are also grateful to Jesse  
756 Poland's research group at Kansas State University for their contribution to genotyping of  
757 CNLM materials. The authors thank the International Wheat Genome Sequencing Con-  
758 sortium for pre-publication access to IWGSC RefSeq v1.0. The authors would also like to  
759 acknowledge Roberto Lonzano Gonzalez for the suggestion of using the coding sequences to  
760 identify homeologous genes. Finally, we would like to acknowledge the Cornell small grains  
761 staff, particularly David Benscher and James Tanaka, who were vital in implementing, col-  
762 lecting and processing the materials used to build the CNLM dataset.

## 763 References

- 764 Adams, Keith L and Jonathan F Wendel (2005). “Polyploidy and genome evolution in  
765 plants”. In: *Current opinion in plant biology* 8.2, pp. 135–141.
- 766 Adams, Keith L et al. (2003). “Genes duplicated by polyploidy show unequal contributions to  
767 the transcriptome and organ-specific reciprocal silencing”. In: *Proceedings of the National  
768 Academy of sciences* 100.8, pp. 4649–4654.
- 769 Akhunova, Alina R et al. (2010). “Homoeolog-specific transcriptional bias in allopolyploid  
770 wheat”. In: *BMC genomics* 11.1, p. 505.
- 771 Allard, Robert W and AD Bradshaw (1964). “Implications of genotype-environmental inter-  
772 actions in applied plant breeding”. In: *Crop science* 4.5, pp. 503–508.
- 773 Álvarez-Castro, José M and Örjan Carlborg (2007). “A unified model for functional and  
774 statistical epistasis and its application in quantitative trait loci analysis”. In: *Genetics*  
775 176.2, pp. 1151–1167.
- 776 Assis, Raquel and Doris Bachtrog (2013). “Neofunctionalization of young duplicate genes  
777 in *Drosophila*”. In: *Proceedings of the National Academy of Sciences* 110.43, pp. 17409–  
778 17414.
- 779 Bates, D et al. (2015a). *Fitting Linear Mixed-Effects Models using lme4*, 1–51. *Computation*.
- 780 Bates, Douglas et al. (2015b). “Parsimonious mixed models”. In: *arXiv preprint arXiv:1506.04967*.
- 781 Beest, Mariska te et al. (2011). “The more the better? The role of polyploidy in facilitating  
782 plant invasions”. In: *Annals of botany* 109.1, pp. 19–45.
- 783 Bingham, ET et al. (1994). “Complementary gene interactions in alfalfa are greater in au-  
784 totetraploids than diploids”. In: *Crop Science* 34.4, pp. 823–829.
- 785 Birchler, James A et al. (2010). “Heterosis”. In: *The Plant Cell* 22.7, pp. 2105–2112.
- 786 Blanc, Guillaume and Kenneth H Wolfe (2004). “Functional divergence of duplicated genes  
787 formed by polyploidy during Arabidopsis evolution”. In: *The Plant Cell* 16.7, pp. 1679–  
788 1691.

- 789 Börner, A et al. (1996). “The relationships between the dwarfing genes of wheat and rye”.  
790 In: *Euphytica* 89.1, pp. 69–75.
- 791 Butler, David (2009). *asreml: asreml() fits the linear mixed model*. R package version 3.0.  
792 URL: [www.vsnr.co.uk](http://www.vsnr.co.uk).
- 793 Camacho, Christiam et al. (2009). “BLAST+: architecture and applications”. In: *BMC bioin-*  
794 *formatics* 10.1, p. 421.
- 795 Carlborg, Örjan et al. (2006). “Epistasis and the release of genetic variation during long-term  
796 selection”. In: *Nature genetics* 38.4, p. 418.
- 797 Chaudhary, Bhupendra et al. (2009). “Reciprocal silencing, transcriptional bias and func-  
798 tional divergence of homeologs in polyploid cotton (*Gossypium*)”. In: *Genetics* 182.2,  
799 pp. 503–517.
- 800 Chen, Z Jeffrey (2010). “Molecular mechanisms of polyploidy and hybrid vigor”. In: *Trends*  
801 *in plant science* 15.2, pp. 57–71.
- 802 — (2013). “Genomic and epigenetic insights into the molecular bases of heterosis”. In: *Nature*  
803 *Reviews Genetics* 14.7, p. 471.
- 804 Chen, Z Jeffrey and Zhongfu Ni (2006). “Mechanisms of genomic rearrangements and gene  
805 expression changes in plant polyploids”. In: *Bioessays* 28.3, pp. 240–252.
- 806 Comai, Luca (2000). “Genetic and epigenetic interactions in allopolyploid plants”. In: *Plant*  
807 *molecular biology* 43.2-3, pp. 387–399.
- 808 Comai, Luca et al. (2003). “Do the different parental heteromes cause genomic shock in newly  
809 formed allopolyploids?” In: *Philosophical Transactions of the Royal Society of London B:*  
810 *Biological Sciences* 358.1434, pp. 1149–1155.
- 811 Dahl, David B. (2016). *xtable: Export Tables to LaTeX or HTML*. R package version 1.8-2.  
812 URL: <https://CRAN.R-project.org/package=xtable>.
- 813 Devos, KM et al. (1995). “Structural evolution of wheat chromosomes 4A, 5A, and 7B and  
814 its impact on recombination”. In: *Theoretical and Applied Genetics* 91.2, pp. 282–288.

- 815 Duarte, Jill M et al. (2005). “Expression pattern shifts following duplication indicative of  
816 subfunctionalization and neofunctionalization in regulatory genes of Arabidopsis”. In:  
817 *Molecular biology and evolution* 23.2, pp. 469–478.
- 818 Dubcovsky, Jorge and Jan Dvořák (2007). “Genome plasticity a key factor in the success of  
819 polyploid wheat under domestication”. In: *Science* 316.5833, pp. 1862–1866.
- 820 Ellstrand, Norman C and Kristina A Schierenbeck (2000). “Hybridization as a stimulus  
821 for the evolution of invasiveness in plants?” In: *Proceedings of the National Academy of*  
822 *Sciences* 97.13, pp. 7043–7050.
- 823 Eshed, Yuval and Dani Zamir (1996). “Less-than-additive epistatic interactions of quantita-  
824 tive trait loci in tomato”. In: *Genetics* 143.4, pp. 1807–1817.
- 825 Feldman, Moshe and Avraham A Levy (2012). “Genome evolution due to allopolyploidization  
826 in wheat”. In: *Genetics* 192.3, pp. 763–774.
- 827 Feldman, Moshe et al. (2012). “Genomic asymmetry in allopolyploid plants: wheat as a  
828 model”. In: *Journal of experimental botany* 63.14, pp. 5045–5059.
- 829 Force, Allan et al. (1999). “Preservation of duplicate genes by complementary, degenerative  
830 mutations”. In: *Genetics* 151.4, pp. 1531–1545.
- 831 Forsberg, Simon KG et al. (2017). “Accounting for genetic interactions improves modeling  
832 of individual quantitative trait phenotypes in yeast”. In: *Nature genetics* 49.4, p. 497.
- 833 Gault, Christine, Karl Kremling, and Edward S Buckler (2018). “Tripsacum de novo tran-  
834 scriptome assemblies reveal parallel gene evolution with maize after ancient polyploidy”.  
835 In: *bioRxiv*, p. 267682.
- 836 Gilmour, AR (1997). “ASREML for testing fixed effects and estimating multiple trait vari-  
837 ance components”. In: *Proceedings of the Association for the Advancement of Animal*  
838 *Breeding and Genetics*. Vol. 12, pp. 386–390.
- 839 Gu, Zuguang et al. (2014). “circlize implements and enhances circular visualization in R”.  
840 In: *Bioinformatics* 30.19, pp. 2811–2812.



- 841 Haldane, JBS (1933). “The part played by recurrent mutation in evolution”. In: *American*  
842 *Naturalist*, pp. 5–19.
- 843 He, Dan, Zhanyong Wang, and Laxmi Parida (2015). “Data-driven encoding for quantitative  
844 genetic trait prediction”. In: *BMC bioinformatics*. Vol. 16. Suppl 1. BioMed Central Ltd,  
845 S10.
- 846 Herskowitz, Ira (1987). “Functional inactivation of genes by dominant negative mutations”.  
847 In: *Nature* 329.6136, pp. 219–222.
- 848 Hill, William G, Michael E Goddard, and Peter M Visscher (2008). “Data and theory point  
849 to mainly additive genetic variance for complex traits”. In: *PLoS Genet* 4.2, e1000008.
- 850 Huang, Wen and Trudy FC Mackay (2016). “The genetic architecture of quantitative traits  
851 cannot be inferred from variance component analysis”. In: *PLoS genetics* 12.11, e1006421.
- 852 IWGSC, International Wheat Genome Sequencing Consortium (2018, accepted). “Shifting  
853 the limits in wheat research and breeding using a fully annotated reference genome by  
854 the International Wheat Genome Sequencing Consortium (IWGSC)”. In: *Science*.
- 855 Jannink, Jean-Luc et al. (2009). “Overview of QTL detection in plants and tests for syner-  
856 gistic epistatic interactions”. In: *Genetica* 136.2, p. 225.
- 857 Jiang, Yong et al. (2017). “A quantitative genetic framework highlights the role of epistatic  
858 effects for grain-yield heterosis in bread wheat”. In: *Nature genetics* 49.12, p. 1741.
- 859 Kashkush, Khalil, Moshe Feldman, and Avraham A Levy (2002). “Gene loss, silencing and  
860 activation in a newly synthesized wheat allotetraploid”. In: *Genetics* 160.4, pp. 1651–  
861 1659.
- 862 — (2003). “Transcriptional activation of retrotransposons alters the expression of adjacent  
863 genes in wheat”. In: *Nature genetics* 33.1, p. 102.
- 864 Krasileva, Ksenia V et al. (2017). “Uncovering hidden variation in polyploid wheat”. In:  
865 *Proceedings of the National Academy of Sciences* 114.6, E913–E921.
- 866 Law, CN, J Sutka, and AJ Worland (1978). “A genetic study of day-length response in  
867 wheat”. In: *Heredity* 41.2, p. 185.

- 868 Lee, Hyeon-Se and Z Jeffrey Chen (2001). “Protein-coding genes are epigenetically regulated  
869 in *Arabidopsis* polyploids”. In: *Proceedings of the National Academy of Sciences* 98.12,  
870 pp. 6753–6758.
- 871 Lewontin, RC (1964). “The interaction of selection and linkage. I. General considerations;  
872 heterotic models”. In: *Genetics* 49.1, pp. 49–67.
- 873 Liu, Shao-Lun, Gregory J Baute, and Keith L Adams (2011). “Organ and cell type-specific  
874 complementary expression patterns and regulatory neofunctionalization between dupli-  
875 cated genes in *Arabidopsis thaliana*”. In: *Genome biology and evolution* 3, pp. 1419–  
876 1436.
- 877 Liu, Zhenlan and Keith L Adams (2007). “Expression partitioning between genes duplicated  
878 by polyploidy under abiotic stress and during organ development”. In: *Current Biology*  
879 17.19, pp. 1669–1674.
- 880 Liu, Zhenshan et al. (2015). “Temporal transcriptome profiling reveals expression parti-  
881 tioning of homeologous genes contributing to heat and drought acclimation in wheat  
882 (*Triticum aestivum* L.)” In: *BMC plant biology* 15.1, p. 152.
- 883 Lynch, Michael and John S Conery (2000). “The evolutionary fate and consequences of  
884 duplicate genes”. In: *Science* 290.5494, pp. 1151–1155.
- 885 Lynch, Michael and Allan Force (2000). “The probability of duplicate gene preservation by  
886 subfunctionalization”. In: *Genetics* 154.1, pp. 459–473.
- 887 Mac Key, James (1970). “Significance of mating systems for chromosomes and gametes in  
888 polyploids”. In: *Hereditas* 66.2, pp. 165–176.
- 889 Marcussen, Thomas et al. (2014). “Ancient hybridizations among the ancestral genomes of  
890 bread wheat”. In: *Science* 345.6194, p. 1250092.
- 891 Martini, Johannes WR et al. (2016). “Epistasis and covariance: how gene interaction trans-  
892 lates into genomic relationship”. In: *Theoretical and Applied Genetics* 129.5, pp. 963–  
893 976.

- 894 Martini, Johannes WR et al. (2017). “Genomic prediction with epistasis models: on the  
895 marker-coding-dependent performance of the extended GBLUP and properties of the  
896 categorical epistasis model (CE)”. In: *BMC bioinformatics* 18.1, p. 3.
- 897 McClintock, Barbara (1984). “The significance of responses of the genome to challenge”. In:  
898 *Science* 266.4676, pp. 792–801.
- 899 Microsoft, R Core Team (2017). *Microsoft R Open*. Microsoft. Redmond, Washington. URL:  
900 <https://mran.microsoft.com/>.
- 901 Mutti, Jasdeep S, Ramanjot K Bhullar, and Kulvinder S Gill (2017). “Evolution of gene  
902 expression balance among homeologs of natural polyploids”. In: *G3: Genes, Genomes,  
903 Genetics* 7.4, pp. 1225–1237.
- 904 Nagasaki, Hideki et al. (2005). “Species-specific variation of alternative splicing and tran-  
905 scriptional initiation in six eukaryotes”. In: *Gene* 364, pp. 53–62.
- 906 Ohno, Susumu (1970). *Evolution by Gene Duplication*. New York: Springer.
- 907 Ohta, Tomoko (1987). “Simulating evolution by gene duplication”. In: *Genetics* 115.1, pp. 207–  
908 213.
- 909 Osborn, Thomas C et al. (2003). “Understanding mechanisms of novel gene expression in  
910 polyploids”. In: *Trends in genetics* 19.3, pp. 141–147.
- 911 Ozkan, Hakan, Avraham A Levy, and Moshe Feldman (2001). “Allopolyploidy-induced rapid  
912 genome evolution in the wheat (*Aegilops*–*Triticum*) group”. In: *The Plant Cell* 13.8,  
913 pp. 1735–1747.
- 914 Paixão, Tiago and Nicholas H Barton (2016). “The effect of gene interactions on the long-  
915 term response to selection”. In: *Proceedings of the National Academy of Sciences* 113.16,  
916 pp. 4422–4427.
- 917 Pfeifer, Matthias et al. (2014). “Genome interplay in the grain transcriptome of hexaploid  
918 bread wheat”. In: *Science* 345.6194, p. 1250091.
- 919 Poland, Jesse (Mar. 6, 2018). personal communication.

- 920 Pumphrey, Michael et al. (2009). “Nonadditive expression of homoeologous genes is estab-  
921 lished upon polyploidization in hexaploid wheat”. In: *Genetics* 181.3, pp. 1147–1157.
- 922 R Core Team (2015). *R: A Language and Environment for Statistical Computing*. R Foun-  
923 dation for Statistical Computing. Vienna, Austria. URL: <http://www.R-project.org/>.
- 924 Rastogi, Shruti and David A Liberles (2005). “Subfunctionalization of duplicated genes as a  
925 transition state to neofunctionalization”. In: *BMC evolutionary biology* 5.1, p. 28.
- 926 Santantonio, Nicholas, Jean-Luc Jannink, and Mark E Sorrells (2018). “Prediction of sub-  
927 genome additive and interaction effects in allohexaploid wheat”. In: *bioRxiv*, p. 373605.
- 928 Scarth, R and CN Law (1983). “The location of the photoperiod gene, Ppd2 and an additional  
929 genetic factor for ear-emergence time on chromosome 2B of wheat”. In: *Heredity* 51.3,  
930 p. 607.
- 931 Segovia-Lerma, A et al. (2004). “Population-based diallel analyses among nine historically  
932 recognized alfalfa germplasms”. In: *Theoretical and applied genetics* 109.8, pp. 1568–1575.
- 933 Segre, Daniel et al. (2005). “Modular epistasis in yeast metabolism”. In: *Nature genetics*  
934 37.1, p. 77.
- 935 Soltis, Douglas E et al. (2009). “Polyploidy and angiosperm diversification”. In: *American*  
936 *journal of botany* 96.1, pp. 336–348.
- 937 Soltis, Pamela S and Douglas E Soltis (2009). “The role of hybridization in plant speciation”.  
938 In: *Annual review of plant biology* 60, pp. 561–588.
- 939 Sorrells, Mark E et al. (2011). “Reconstruction of the Synthetic W7984× Opata M85 wheat  
940 reference population”. In: *Genome* 54.11, pp. 875–882.
- 941 Stoltzfus, Arlin (1999). “On the possibility of constructive neutral evolution”. In: *Journal of*  
942 *Molecular Evolution* 49.2, pp. 169–181.
- 943 Tantau, Till (Apr. 8, 2018). *The TikZ and PGF Packages. Manual for version 3.0.1*. URL:  
944 <http://sourceforge.net/projects/pgf/>.
- 945 VanRaden, PM (2008). “Efficient methods to compute genomic predictions”. In: *Journal of*  
946 *dairy science* 91.11, pp. 4414–4423.

- 947 Veitia, Reiner A (2007). “Exploring the molecular etiology of dominant-negative mutations”.  
948 In: *The Plant Cell* 19.12, pp. 3843–3851.
- 949 Vitezica, Zulma G et al. (2017). “Orthogonal Estimates of Variances for Additive, Domi-  
950 nance, and Epistatic Effects in Populations”. In: *Genetics* 206.3, pp. 1297–1307.
- 951 Wagner, Andreas (2005). “Distributed robustness versus redundancy as causes of mutational  
952 robustness”. In: *Bioessays* 27.2, pp. 176–188.
- 953 Walsh, J Bruce (1995). “How often do duplicated genes evolve new functions?” In: *Genetics*  
954 139.1, pp. 421–428.
- 955 Wang, Jianlin et al. (2004). “Stochastic and epigenetic changes of gene expression in Ara-  
956 bidopsis polyploids”. In: *Genetics* 167.4, pp. 1961–1973.
- 957 Welsh J.R. Keim D.L., Pirasteh B. and Richards R.D. (1973). “Genetic control of pho-  
958 toperiod response in wheat”. In: *Proceedings of the fourth International Wheat Genetics*  
959 *Symposium*. Ed. by Sears E.R. and Sears L.E.S. University of Missouri, Columbia, Mo.,  
960 pp. 879–884.
- 961 Wendel, Jonathan F (2000). “Genome evolution in polyploids”. In: *Plant molecular evolution*.  
962 Springer, pp. 225–249.
- 963 Wood, Andrew R et al. (2014). “Another explanation for apparent epistasis”. In: *Nature*  
964 514.7520, E3.
- 965 Zeng, Zhao-Bang and C Clark Cockerham (1993). “Mutation models and quantitative genetic  
966 variation.” In: *Genetics* 133.3, pp. 729–736.
- 967 Zeng, Zhao-Bang, Tao Wang, and Wei Zou (2005). “Modeling quantitative trait loci and  
968 interpretation of models”. In: *Genetics* 169.3, pp. 1711–1725.
- 969 Zhang, Yumei et al. (2016). “Expression partitioning of homeologs and tandem duplications  
970 contribute to salt tolerance in wheat (*Triticum aestivum* L.)” In: *Scientific reports* 6,  
971 p. 21476.
- 972 Zhang, Zhiwu et al. (2010). “Mixed linear model approach adapted for genome-wide associ-  
973 ation studies”. In: *Nature genetics* 42.4, pp. 355–360.

## 974 **A1 Appendix 1 - RIL population**

975 The population was formed from a cross between two Cornell soft winter wheat lines,  
976 NY91017-8080 and Caledonia. Caledonia contains a GA-insensitive 4D allele, *d*, and a wild-  
977 type 4B allele, *B*, while NY91017-8080 has a GA-insensitive 4B allele, *b*, and the wild type  
978 4D allele, *D*. The population consisting of 192 individuals was planted in single row plots  
979 in Ithaca NY and measured for plant height in 2008. The population was screened for loci  
980 influencing plant height on chromosomes 4B and 4D using genotyping by sequencing (GBS)  
981 markers. The markers with the lowest p-value on the short arms of 4B and 4D were used to  
982 indicate the *Rht-1* gene in this study. Only individuals with homozygous genotype calls for  
983 both loci were included to test for epistasis. This resulted in 19 double dwarfs (*bbdd*), 51 D  
984 genome semi-dwarfs (*BBdd*), 35 B genome semi-dwarfs(*bbDD*), and 53 tall (*BBDD*), for a  
985 total of 158 individuals. It appears that the Caledonia parent plant used in the cross was  
986 heterozygous for the D genome dwarfing allele, resulting in the 1:2 segregation ratio for the  
987 *d* : *D* alleles, and was confirmed by the genotype call for that plant.

## 988 **A2 Appendix 2 - Coding Sequence Alignment**

989 Alignments of coding sequences was accomplished with BLAST+, allowing up to 10 align-  
990 ments with an e-value cutoff of 1e-5. Alignments were only considered if they aligned to  
991 80% or more of the query gene. Of the 110,790 coding sequences, 13,111 triplicate sets  
992 with one gene on each homeologous chromosome (representing 39,333 genes) were identified  
993 with no other alignments meeting the criterion. An additional 5,073 triplicates (representing  
994 15,219 genes) were added by selecting the top 2 alignments if they were on the corresponding  
995 homeologous chromosomes. Duplicate sets were also included if there was not a third align-  
996 ment to one of the three sub-genomes, adding an additional 5,612 duplicates. The coding  
997 sequences for which we did not identify homeologous genes either appeared to be singletons  
998 (24,695 coding sequences) that did not have a good alignment to a gene on a homeologous

999 chromosome, or had many alignments across the genome making it impossible to determine  
1000 with certainty which alignments were truly homeologous (20,319 coding sequences).

### 1001 **A3 Appendix 3 - Change of reference**

1002 Following Álvarez-Castro and Carlborg (2007), we demonstrate the change-of-reference op-  
1003 eration simplified for inbred populations. For  $\{0, 1\}$  marker coding and allowing  $G_1$  to be  
1004 the reference genotype, the genotypic values at a single locus can be represented as

$$\mathbf{G} = \begin{bmatrix} G_1 \\ G_2 \end{bmatrix} = \mathbf{S}_{01} \mathbf{E}_{01} = \begin{bmatrix} 1 & 0 \\ 1 & 1 \end{bmatrix} \begin{bmatrix} \mu \\ a \end{bmatrix} \quad (5)$$

1005 where  $\mathbf{S}_{01}$  is the marker score matrix using the  $\{0, 1\}$  marker parameterization and  $\mathbf{E}_{01}$  is  
1006 the vector of expected values. For the two locus epistasis model, the four genotypic values  
1007 are then

$$\mathbf{G} = \begin{bmatrix} G_{11} \\ G_{12} \\ G_{21} \\ G_{22} \end{bmatrix} = (\mathbf{S}_{01} \otimes \mathbf{S}_{01}) \mathbf{E}_{01} = \begin{bmatrix} 1 & 0 & 0 & 0 \\ 1 & 0 & 1 & 0 \\ 1 & 1 & 0 & 0 \\ 1 & 1 & 1 & 1 \end{bmatrix} \begin{bmatrix} \mu \\ a_1 \\ a_2 \\ a_1 a_2 \end{bmatrix} \quad (6)$$

1008 The three locus interaction is extended by

$$\mathbf{G} = (\mathbf{S}_{01} \otimes \mathbf{S}_{01} \otimes \mathbf{S}_{01}) [\mu \ a_1 \ a_2 \ a_1 a_2 \ a_3 \ a_1 a_3 \ a_2 a_3 \ a_1 a_2 a_3]^T \quad (7)$$

To shift from  $\{-1, 1\}$  coding estimates,  $\beta_{101}$ , to  $\{0, 1\}$  coding estimates,  $\beta_{01}$  the following transformation exists (Álvarez-Castro and Carlborg 2007). Let  $\mathbf{S}_{-11}$  indicate the  $\{-1, 1\}$  marker parameterization

$$\mathbf{S}_{-11} = \begin{bmatrix} 1 & -1 \\ 1 & 1 \end{bmatrix}$$

1009 then  $\mathbf{E}_{01} = (\mathbf{S}_{01}^{-1} \otimes \mathbf{S}_{01}^{-1})(\mathbf{S}_{-11} \otimes \mathbf{S}_{-11})\mathbf{E}_{-11}$ .



## 1010 S1 Supplementary Materials

Table S1: ANOVA table for *Rht-1B* and *Rht-1D* linked GBS markers and their epistatic interaction for plant height (cm) in 158 RIL lines derived from NY91017-8080 × Caledonia.

| Source            | df  | SS    | MS   | F value | $-\log_{10}(\text{p-value})$ |
|-------------------|-----|-------|------|---------|------------------------------|
| SNP36427          | 1   | 7065  | 7065 | 53.5    | 10.9                         |
| SNP11172          | 1   | 7391  | 7391 | 56.0    | 11.3                         |
| SNP36427:SNP11172 | 1   | 1243  | 1243 | 9.4     | 2.6                          |
| Residuals         | 154 | 20323 | 132  |         |                              |

Table S2: Table of genotype frequencies for the *Rht-1* linked homeologous markers in the CNLM population. The + and – signs indicate the wildtype and mutant alleles, respectively. The margins indicate the marker allele frequencies.

|                                 | S4D_PART1_10982050 <sup>-</sup> | S4D_PART1_10982050 <sup>+</sup> |             |
|---------------------------------|---------------------------------|---------------------------------|-------------|
| S4B_PART1_38624956 <sup>-</sup> | 0.022                           | 0.095                           | 0.117       |
| S4B_PART1_38624956 <sup>+</sup> | 0.525                           | 0.357                           | 0.883       |
|                                 | 0.547                           | 0.452                           | $D' = 0.66$ |

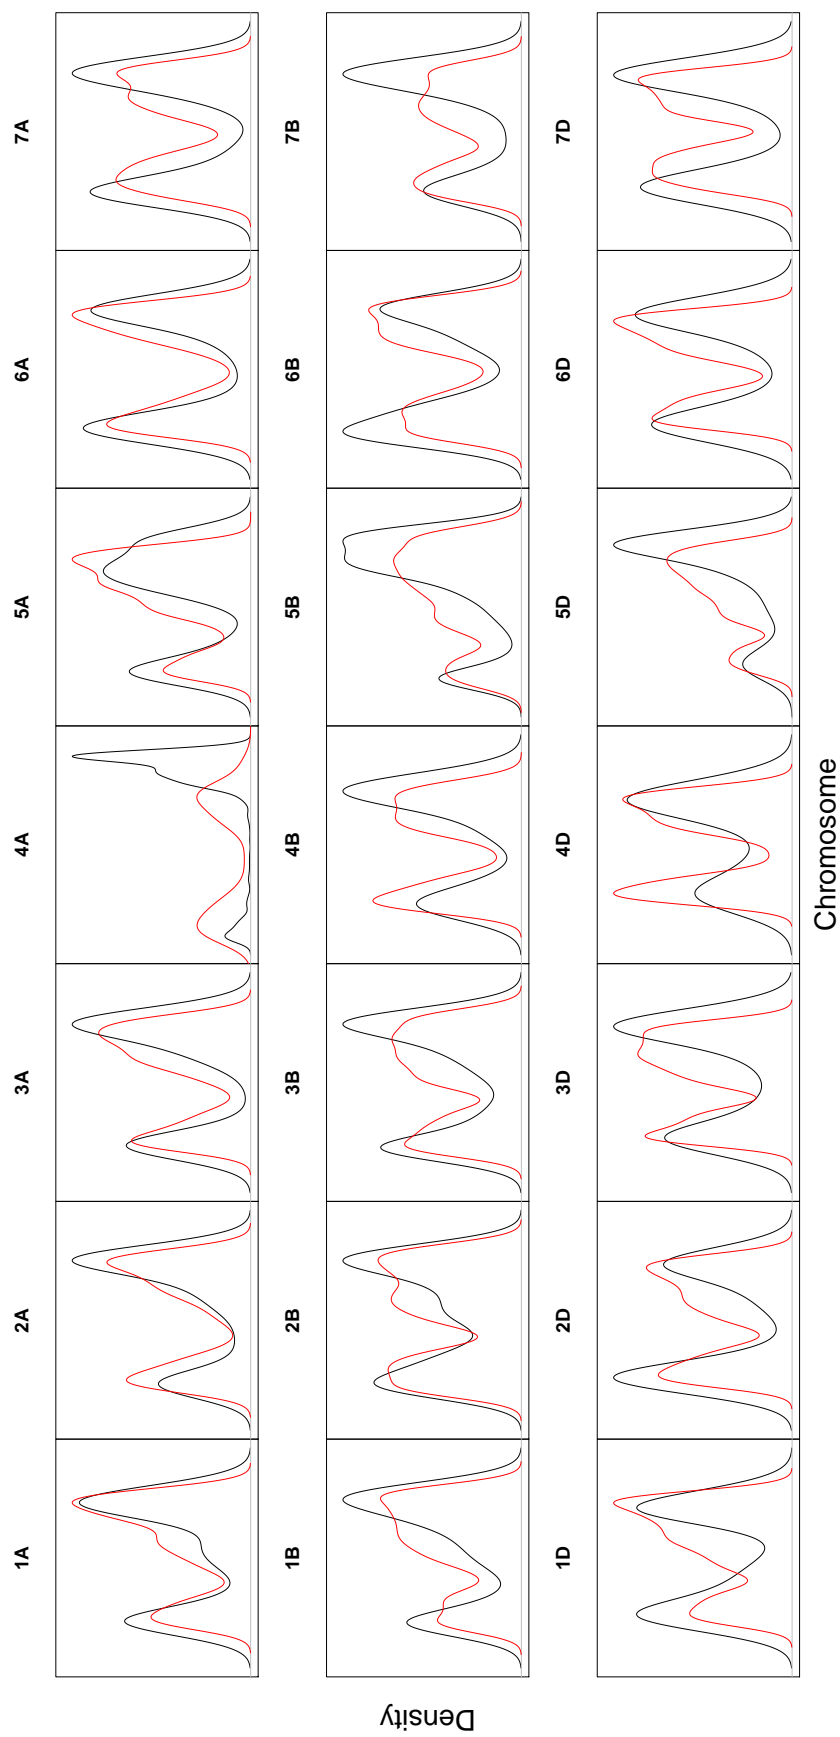

Figure S1: Smoothed densities of GBS markers (black) and genes (red) along the 21 wheat chromosomes in the CNLM population.

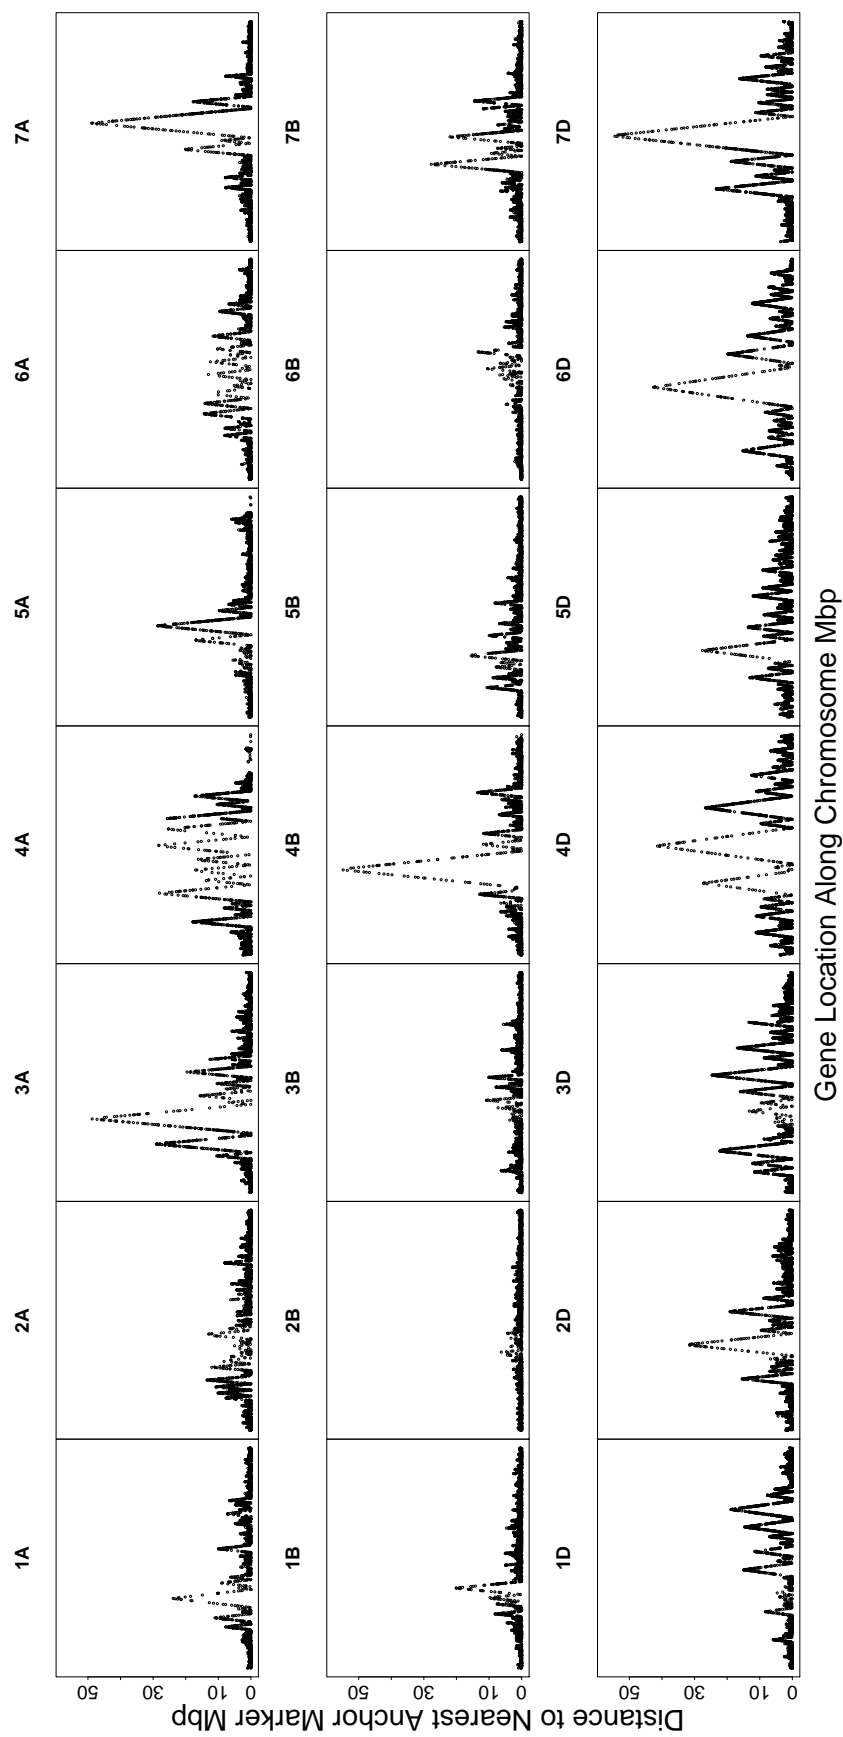

Figure S2: Distance of genes from their nearest GBS anchor marker along the 21 wheat chromosomes in the CNLM population.

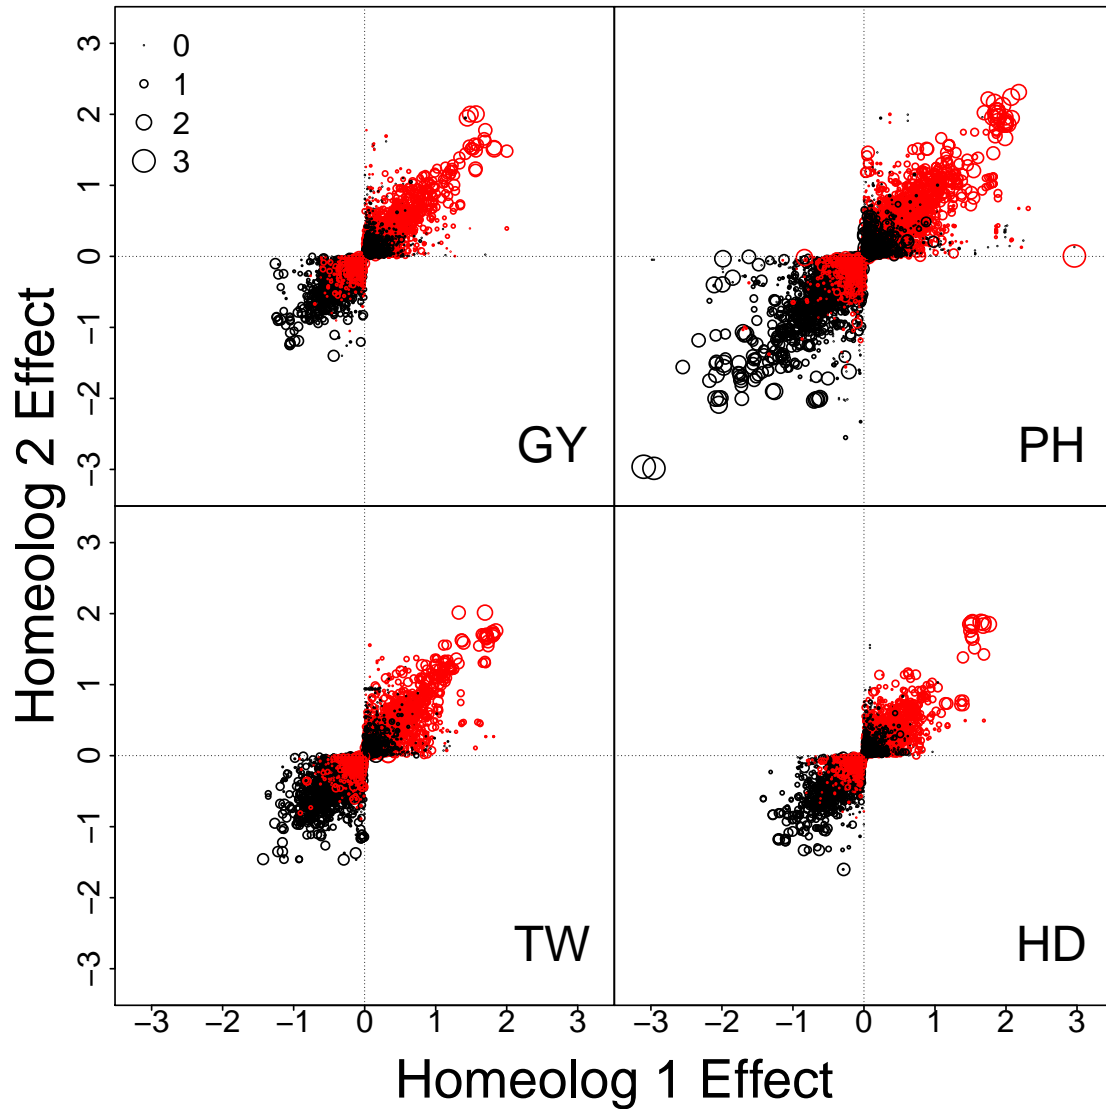

Figure S3: LAVHAE oriented homeologous marker pair additive effects with point size representing the magnitude of the two-way homeologous interaction effect, and the color denoting the direction of that effect where black is positive and red is negative. Four traits, GY, PH, TW and HD, are shown.

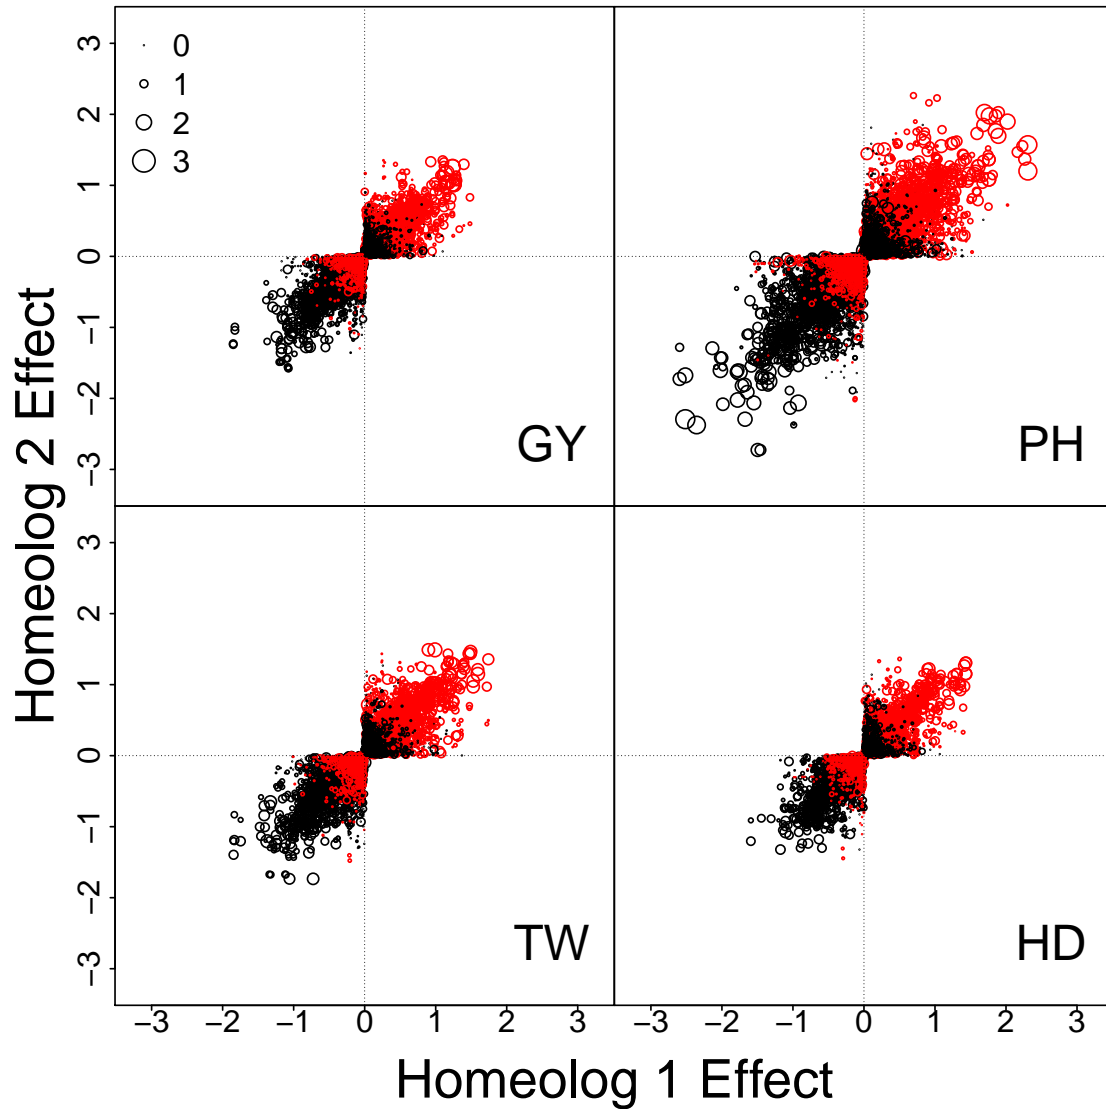

Figure S4: LAVHAE oriented homeologous marker pair additive effects with point size representing the magnitude of the two-way homeologous interaction effect, and the color denoting the direction of that effect where black is positive and red is negative. Four simulated phenotypes sampled to obtain no epistatic interactions, GY, PH, TW and HD, are shown.

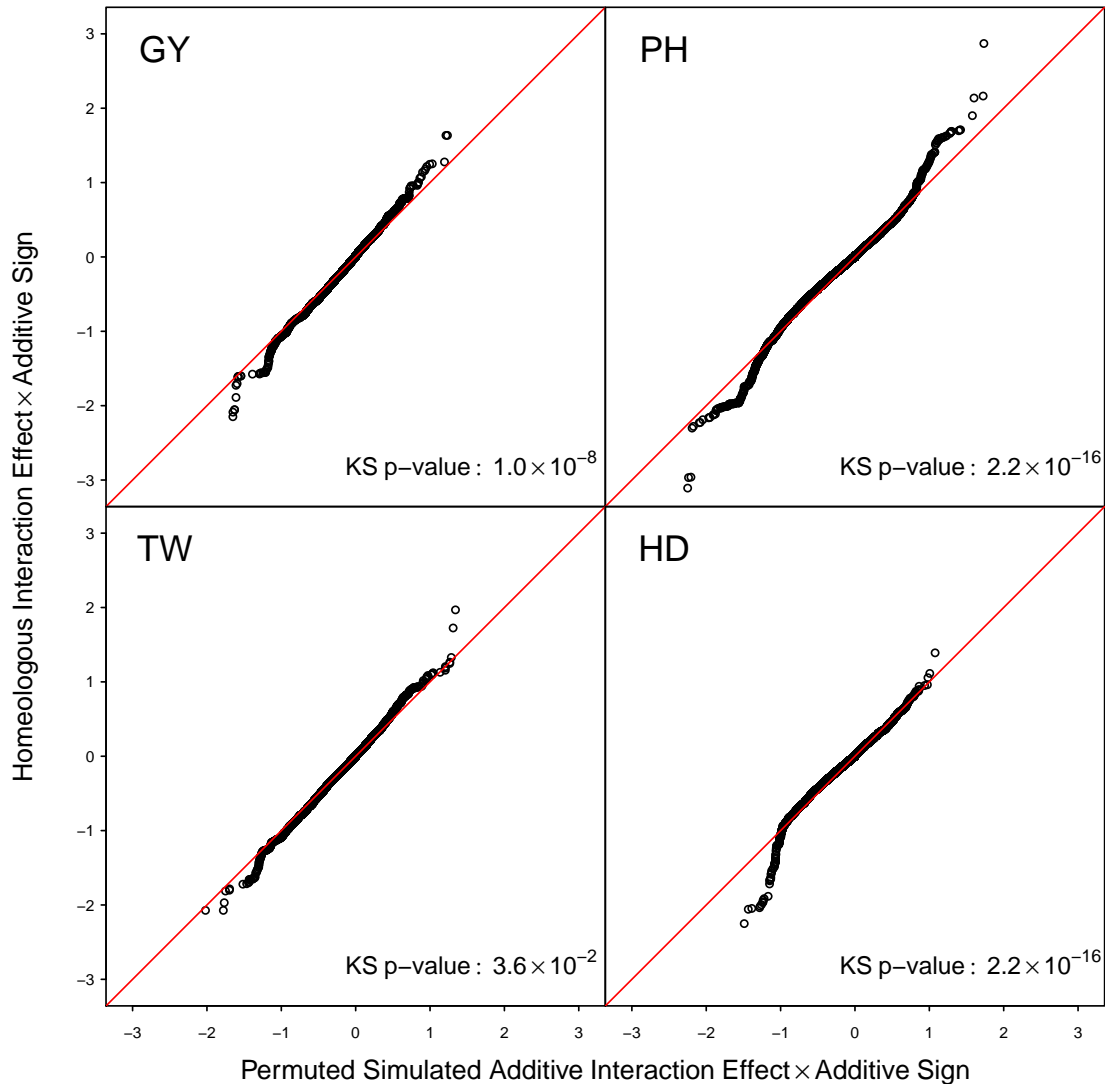

Figure S5: Quantile quantile plot of the ordered estimated homeologous interaction effects plotted against those from a simulated phenotype sampled to obtain no epistatic interactions using the LAVHAE marker orientation. Markers scores were permuted before simulation of the phenotype to remove LD between markers. Interaction effects have been multiplied by the effect sign of the corresponding additive effects to emphasize the relationship between the additive and interaction effects.

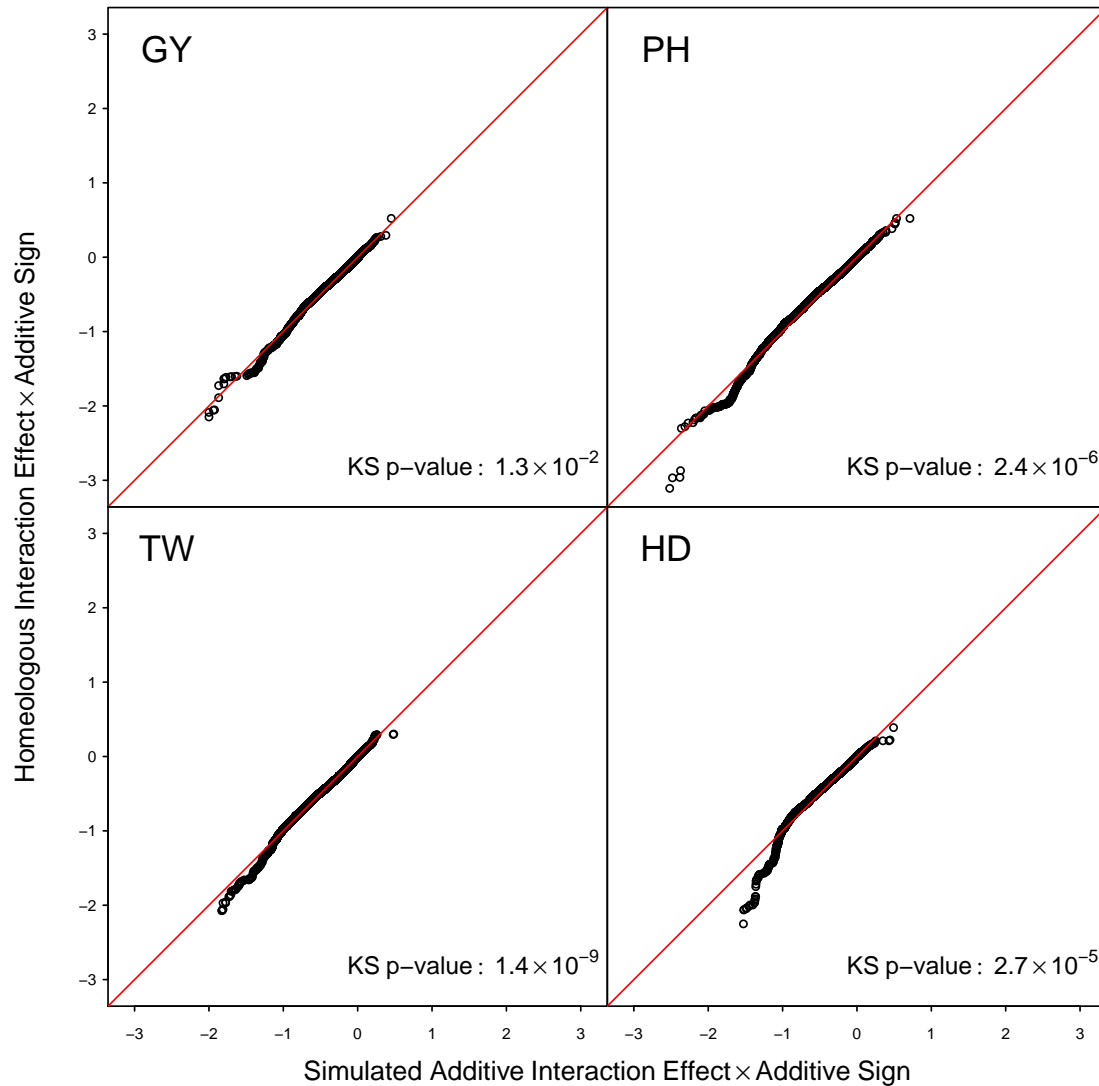

Figure S6: Quantile quantile plot of the ordered estimated homeologous interaction effects plotted against those from a simulated phenotype sampled to obtain no epistatic interactions using the HTEV marker orientation. Interaction effects have been multiplied by the effect sign of the corresponding additive effects to emphasize the relationship between the additive and interaction effects.

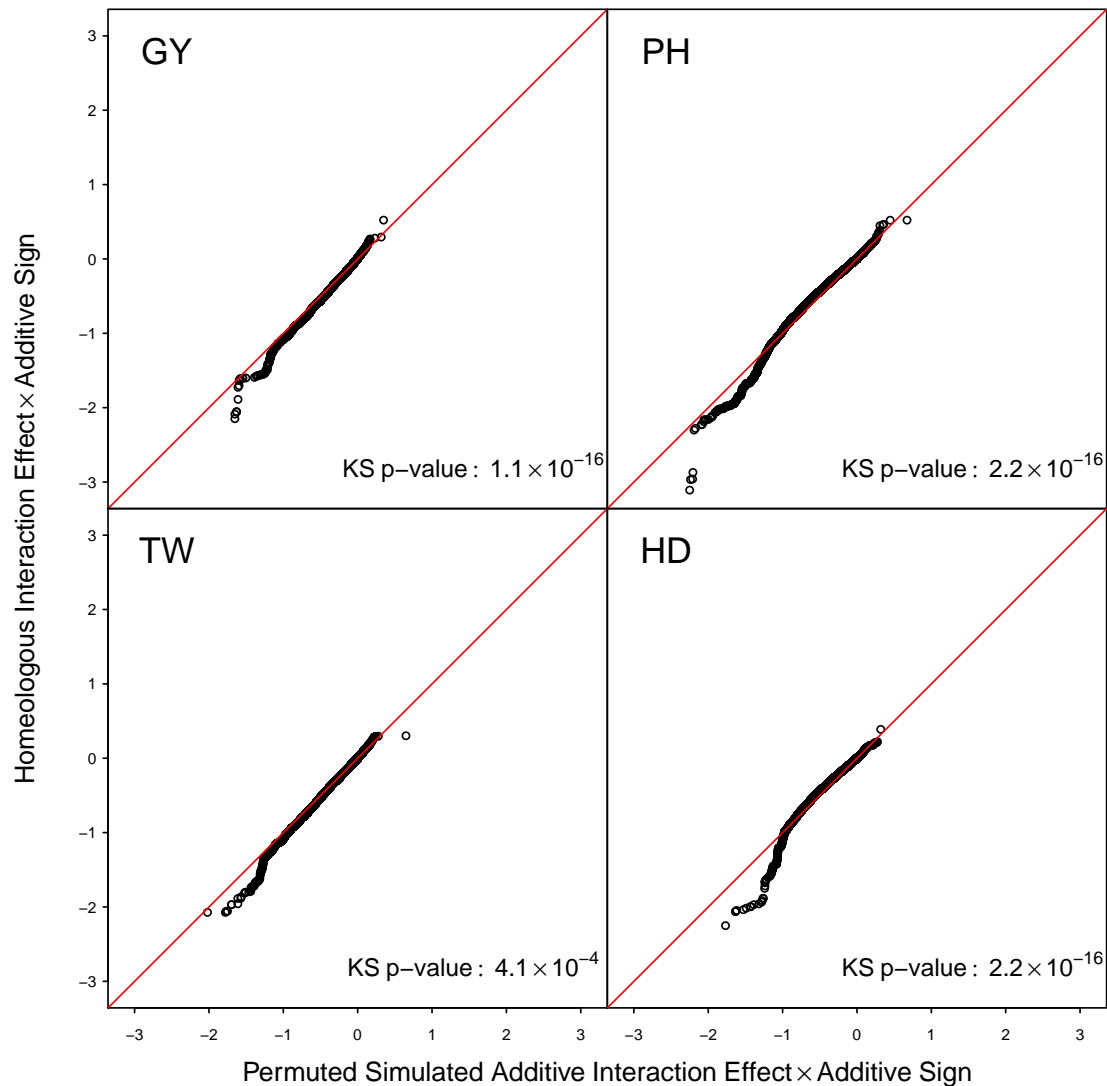

Figure S7: Quantile quantile plot of the ordered estimated homeologous interaction effects plotted against those from a simulated phenotype sampled to obtain no epistatic interactions using the HTEV marker orientation. Markers scores were permuted before simulation of the phenotype to remove LD between markers. Interaction effects have been multiplied by the effect sign of the corresponding additive effects to emphasize the relationship between the additive and interaction effects.



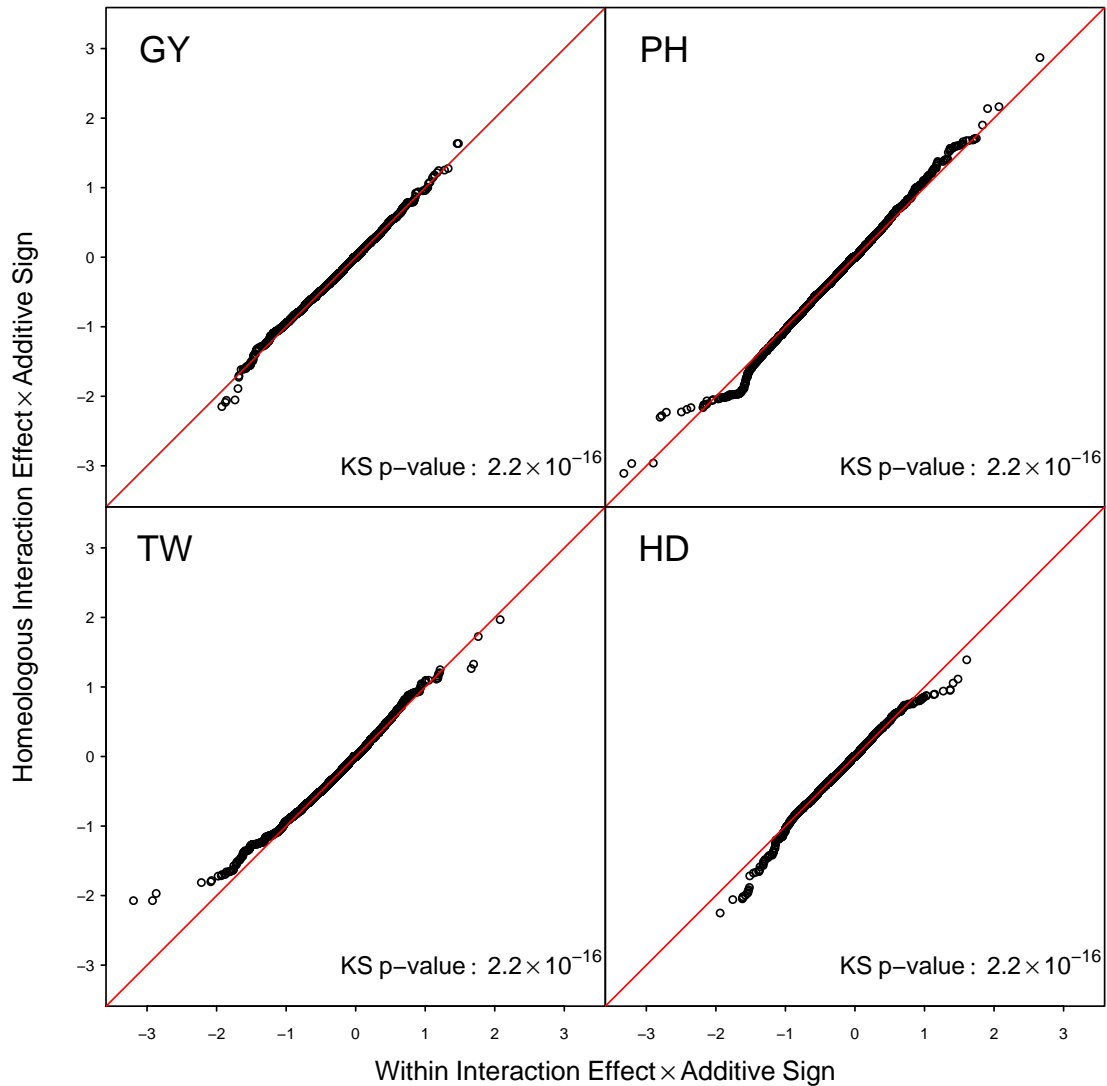

Figure S8: Quantile quantile plot of the ordered estimated homeologous interaction effects plotted against those from marker sets sampled within subgenome chromosomes (Within) using the LAVHAE. Interaction effects have been multiplied by the effect sign of the corresponding additive effects to emphasize the relationship between the additive and interaction effects.

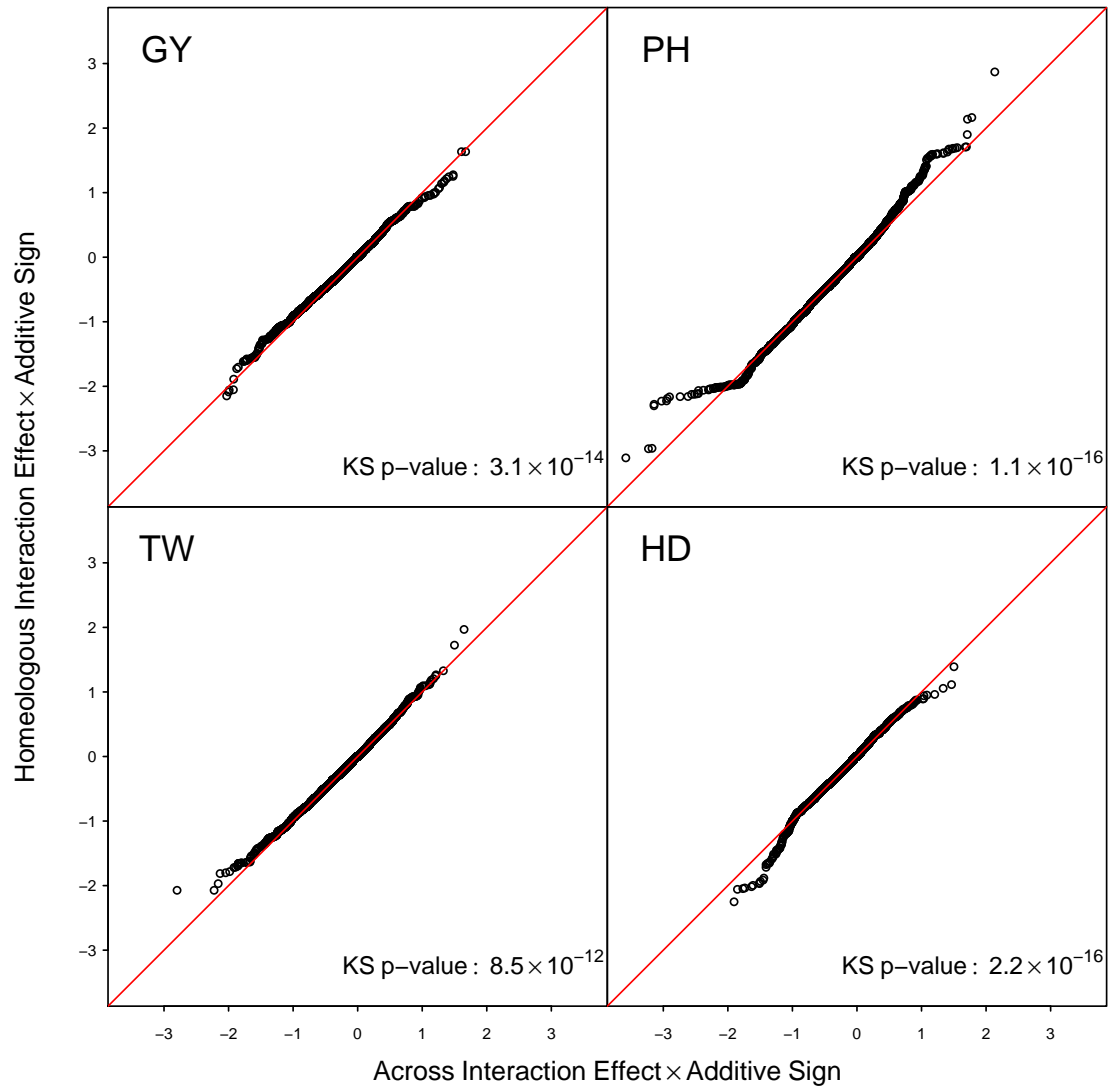

Figure S9: Quantile quantile plot of the ordered estimated homeologous interaction effects plotted against those from marker sets sampled across non-syntenic subgenome chromosomes (Across) using the LAVHAE marker orientation. Interaction effects have been multiplied by the effect sign of the corresponding additive effects to emphasize the relationship between the additive and interaction effects.

Table S3: Mixed model REML fit summaries of one additive and four epistasis models for 4 traits (GY, PH, TW and HD) in the CNLM population based on the {0,1} marker parameterization using the LAVHAE marker orientation.

| Trait |                   | Homeo                                 | Within                       | Across                       |
|-------|-------------------|---------------------------------------|------------------------------|------------------------------|
| GY    | log $\mathcal{L}$ | -48                                   | -47                          | -42                          |
|       | parameters        | 29                                    | 29                           | 29                           |
|       | AIC               | 155                                   | 152                          | 143                          |
|       | G                 | 0.267 <sup>a</sup> (7.6) <sup>b</sup> | 0.207 (5.5)                  | 0.146 (4.16)                 |
|       | H                 | 0 (0.01)                              | 0.054 (1.73)                 | 0.108 (3.39) <sup>***</sup>  |
|       | R                 | 0.324 (61.81) <sup>c</sup>            | 0.324 (61.77)                | 0.324 (61.8)                 |
| PH    | log $\mathcal{L}$ | 2282                                  | 2268                         | 2285                         |
|       | parameters        | 27                                    | 27                           | 27                           |
|       | AIC               | -4510                                 | -4482                        | -4516                        |
|       | G                 | 1.198 (5.03)                          | 1.766 (6.95)                 | 1.177 (5.02)                 |
|       | H                 | 1.981 (8.36) <sup>****</sup>          | 1.592 (6.95) <sup>****</sup> | 2.051 (8.66) <sup>****</sup> |
|       | R                 | 0.134 (56.23)                         | 0.134 (56.24)                | 0.134 (56.24)                |
| HD    | log $\mathcal{L}$ | 6382                                  | 6364                         | 6379                         |
|       | parameters        | 28                                    | 28                           | 28                           |
|       | AIC               | -12709                                | -12673                       | -12702                       |
|       | G                 | 1.51 (6.14)                           | 2.077 (7.82)                 | 1.659 (6.67)                 |
|       | H                 | 1.781 (7.73) <sup>****</sup>          | 1.358 (6.09) <sup>****</sup> | 1.68 (7.36) <sup>****</sup>  |
|       | R                 | 0.053 (58.84)                         | 0.054 (58.78)                | 0.054 (58.81)                |
| TW    | log $\mathcal{L}$ | 1560                                  | 1555                         | 1567                         |
|       | parameters        | 29                                    | 29                           | 29                           |
|       | AIC               | -3061                                 | -3052                        | -3076                        |
|       | G                 | 0.553 (5.88)                          | 0.659 (6.68)                 | 0.498 (5.57)                 |
|       | H                 | 0.414 (5.04) <sup>****</sup>          | 0.331 (4.06) <sup>***</sup>  | 0.482 (5.85) <sup>****</sup> |
|       | R                 | 0.199 (60.11)                         | 0.199 (60.1)                 | 0.198 (60.13)                |

<sup>a</sup>Variance component estimates reported for additive main effects (G) and epistatic interactions (H) are the ratios of the actual variance component to the residual variance component for ease of comparison.

<sup>b</sup>The variance component divided by their respective standard errors are shown in parentheses.

<sup>c</sup>The residual variance components, R, are the actual estimates from the centered and scaled data (refer to Santantonio et al. (2018) for scaling coefficients).

\*, \*\*, \*\*\*, \*\*\*\* denote p-values of  $p < 0.05$ ,  $p < 0.01$ ,  $p < 0.001$ ,  $p < 10^{-6}$ , respectively for the likelihood ratio test to determine if the epistatic variance component is zero.

Table S4: Mixed model REML fit summaries of one additive and four epistasis models for 4 traits (GY, PH, TW and HD) in the CNLM population based on the  $\{-1, 1\}$  marker parameterization using the POS marker orientation.

| Trait |                   | Homeo                                   | Within                       | Across                       |
|-------|-------------------|-----------------------------------------|------------------------------|------------------------------|
| GY    | log $\mathcal{L}$ | -48                                     | -41                          | -40                          |
|       | parameters        | 29                                      | 29                           | 29                           |
|       | AIC               | 154                                     | 140                          | 138                          |
|       | G                 | 0.257 <sup>a</sup> (10.31) <sup>b</sup> | 0.191 (7.44)                 | 0.186 (7.32)                 |
|       | H                 | 0.008 (0.75)                            | 0.052 (3.45) <sup>***</sup>  | 0.054 (3.61) <sup>***</sup>  |
|       | R                 | 0.324 (61.7) <sup>c</sup>               | 0.323 (61.64)                | 0.323 (61.64)                |
| PH    | log $\mathcal{L}$ | 2287                                    | 2323                         | 2326                         |
|       | parameters        | 27                                      | 27                           | 27                           |
|       | AIC               | -4521                                   | -4593                        | -4598                        |
|       | G                 | 2.316 (13.04)                           | 1.507 (9.34)                 | 1.551 (9.59)                 |
|       | H                 | 0.705 (7.3) <sup>****</sup>             | 1.056 (9.85) <sup>****</sup> | 1.036 (9.72) <sup>****</sup> |
|       | R                 | 0.134 (56.29)                           | 0.133 (56.38)                | 0.133 (56.4)                 |
| HD    | log $\mathcal{L}$ | 6379                                    | 6393                         | 6415                         |
|       | parameters        | 28                                      | 28                           | 28                           |
|       | AIC               | -12701                                  | -12730                       | -12774                       |
|       | G                 | 2.547 (13.61)                           | 2.017 (10.81)                | 1.689 (9.94)                 |
|       | H                 | 0.601 (6.43) <sup>****</sup>            | 0.848 (8.04) <sup>****</sup> | 0.982 (9.26) <sup>****</sup> |
|       | R                 | 0.053 (58.83)                           | 0.053 (58.87)                | 0.053 (58.92)                |
| TW    | log $\mathcal{L}$ | 1589                                    | 1599                         | 1604                         |
|       | parameters        | 29                                      | 29                           | 29                           |
|       | AIC               | -3120                                   | -3139                        | -3150                        |
|       | G                 | 0.554 (9.49)                            | 0.437 (7.44)                 | 0.395 (7.02)                 |
|       | H                 | 0.282 (7.22) <sup>****</sup>            | 0.354 (8.36) <sup>****</sup> | 0.368 (8.71) <sup>****</sup> |
|       | R                 | 0.198 (60.18)                           | 0.197 (60.2)                 | 0.197 (60.21)                |

<sup>a</sup>Variance component estimates reported for additive main effects (G) and epistatic interactions (H) are the ratios of the actual variance component to the residual variance component for ease of comparison.

<sup>b</sup>The variance component divided by their respective standard errors are shown in parentheses.

<sup>c</sup>The residual variance components, R, are the actual estimates from the centered and scaled data (refer to Santantonio et al. (2018) for scaling coefficients).

\*, \*\*, \*\*\*, \*\*\*\* denote p-values of  $p < 0.05$ ,  $p < 0.01$ ,  $p < 0.001$ ,  $p < 10^{-6}$ , respectively for the likelihood ratio test to determine if the epistatic variance component is zero.

Table S5: Mixed model REML fit summaries of one additive and four epistasis models for 4 traits (GY, PH, TW and HD) in the CNLM population based on the  $\{-1, 1\}$  marker parameterization using the NEG marker orientation.

| Trait |                   | Homeo                                  | Within                        | Across                        |
|-------|-------------------|----------------------------------------|-------------------------------|-------------------------------|
| GY    | $\log\mathcal{L}$ | -46                                    | -38                           | -35                           |
|       | parameters        | 29                                     | 29                            | 29                            |
|       | AIC               | 151                                    | 134                           | 129                           |
|       | G                 | 0.236 <sup>a</sup> (9.44) <sup>b</sup> | 0.181 (7.35)                  | 0.178 (7.35)                  |
|       | H                 | 0.022 (1.86)                           | 0.058 (3.9) <sup>***</sup>    | 0.06 (4.1) <sup>****</sup>    |
|       | R                 | 0.324 (61.71) <sup>c</sup>             | 0.323 (61.68)                 | 0.322 (61.68)                 |
| PH    | $\log\mathcal{L}$ | 2293                                   | 2336                          | 2342                          |
|       | parameters        | 27                                     | 27                            | 27                            |
|       | AIC               | -4532                                  | -4619                         | -4629                         |
|       | G                 | 2.235 (12.79)                          | 1.428 (9.19)                  | 1.464 (9.46)                  |
|       | H                 | 0.746 (7.52) <sup>****</sup>           | 1.061 (10.06) <sup>****</sup> | 1.038 (10.07) <sup>****</sup> |
|       | R                 | 0.134 (56.3)                           | 0.133 (56.39)                 | 0.133 (56.42)                 |
| HD    | $\log\mathcal{L}$ | 6380                                   | 6402                          | 6409                          |
|       | parameters        | 28                                     | 28                            | 28                            |
|       | AIC               | -12704                                 | -12747                        | -12762                        |
|       | G                 | 2.48 (13.41)                           | 1.88 (10.5)                   | 1.753 (10.09)                 |
|       | H                 | 0.626 (6.71) <sup>****</sup>           | 0.895 (8.59) <sup>****</sup>  | 0.95 (9.02) <sup>****</sup>   |
|       | R                 | 0.053 (58.83)                          | 0.053 (58.89)                 | 0.053 (58.9)                  |
| TW    | $\log\mathcal{L}$ | 1580                                   | 1605                          | 1601                          |
|       | parameters        | 29                                     | 29                            | 29                            |
|       | AIC               | -3101                                  | -3153                         | -3144                         |
|       | G                 | 0.614 (9.96)                           | 0.373 (6.78)                  | 0.388 (6.71)                  |
|       | H                 | 0.241 (6.4) <sup>****</sup>            | 0.374 (8.94) <sup>****</sup>  | 0.367 (8.59) <sup>****</sup>  |
|       | R                 | 0.199 (60.15)                          | 0.198 (60.22)                 | 0.197 (60.21)                 |

<sup>a</sup>Variance component estimates reported for additive main effects (G) and epistatic interactions (H) are the ratios of the actual variance component to the residual variance component for ease of comparison.

<sup>b</sup>The variance component divided by their respective standard errors are shown in parentheses.

<sup>c</sup>The residual variance components, R, are the actual estimates from the centered and scaled data (refer to Santantonio et al. (2018) for scaling coefficients).

\*, \*\*, \*\*\*, \*\*\*\* denote p-values of  $p < 0.05$ ,  $p < 0.01$ ,  $p < 0.001$ ,  $p < 10^{-6}$ , respectively for the likelihood ratio test to determine if the epistatic variance component is zero.

Table S6: Mixed model REML fit summaries of one additive and four epistasis models for 4 traits (GY, PH, TW and HD) in the CNLM population based on the  $\{-1, 1\}$  marker parameterization using the HTEV marker orientation.

| trait |                   | Homeo                                  | Within                        | Across                        |
|-------|-------------------|----------------------------------------|-------------------------------|-------------------------------|
| GY    | log $\mathcal{L}$ | -46                                    | -34                           | -30                           |
|       | parameters        | 29                                     | 29                            | 29                            |
|       | AIC               | 151                                    | 127                           | 118                           |
|       | G                 | 0.233 <sup>a</sup> (9.23) <sup>b</sup> | 0.165 (6.86)                  | 0.151 (6.45)                  |
|       | H                 | 0.025 (1.97)                           | 0.071 (4.56) <sup>****</sup>  | 0.079 (5) <sup>****</sup>     |
|       | R                 | 0.323 (61.65) <sup>c</sup>             | 0.322 (61.66)                 | 0.322 (61.67)                 |
| PH    | log $\mathcal{L}$ | 2300                                   | 2355                          | 2357                          |
|       | parameters        | 27                                     | 27                            | 27                            |
|       | AIC               | -4546                                  | -4655                         | -4659                         |
|       | G                 | 2.052 (12.02)                          | 1.101 (7.81)                  | 1.142 (7.99)                  |
|       | H                 | 0.84 (8.12) <sup>****</sup>            | 1.227 (11.24) <sup>****</sup> | 1.209 (11.09) <sup>****</sup> |
|       | R                 | 0.133 (56.32)                          | 0.133 (56.43)                 | 0.133 (56.46)                 |
| HD    | log $\mathcal{L}$ | 6397                                   | 6410                          | 6423                          |
|       | parameters        | 28                                     | 28                            | 28                            |
|       | AIC               | -12738                                 | -12764                        | -12790                        |
|       | G                 | 2.13 (12.27)                           | 1.62 (9.54)                   | 1.395 (8.69)                  |
|       | H                 | 0.808 (7.9) <sup>****</sup>            | 1.029 (9.43) <sup>****</sup>  | 1.139 (10.18) <sup>****</sup> |
|       | R                 | 0.053 (58.88)                          | 0.053 (58.91)                 | 0.053 (58.94)                 |
| TW    | log $\mathcal{L}$ | 1599                                   | 1623                          | 1623                          |
|       | parameters        | 29                                     | 29                            | 29                            |
|       | AIC               | -3140                                  | -3189                         | -3187                         |
|       | G                 | 0.476 (8.51)                           | 0.283 (5.73)                  | 0.267 (5.4)                   |
|       | H                 | 0.335 (7.92) <sup>****</sup>           | 0.435 (10.13) <sup>****</sup> | 0.45 (10.15) <sup>****</sup>  |
|       | R                 | 0.198 (60.2)                           | 0.197 (60.29)                 | 0.197 (60.28)                 |

<sup>a</sup>Variance component estimates reported for additive main effects (G) and epistatic interactions (H) are the ratios of the actual variance component to the residual variance component for ease of comparison.

<sup>b</sup>The variance component divided by their respective standard errors are shown in parentheses.

<sup>c</sup>The residual variance components, R, are the actual estimates from the centered and scaled data (refer to Santantonio et al. (2018) for scaling coefficients).

\*, \*\*, \*\*\*, \*\*\*\* denote p-values of  $p < 0.05$ ,  $p < 0.01$ ,  $p < 0.001$ ,  $p < 10^{-6}$ , respectively for the likelihood ratio test to determine if the epistatic variance component is zero.

Table S7: Mixed model REML fit summaries of one additive and four epistasis models for 4 traits (GY, PH, TW and HD) in the CNLM population based on the {0,1} marker parameterization using the HTEV marker orientation.

| trait |                   | Homeo                                   | Within                      | Across                      |
|-------|-------------------|-----------------------------------------|-----------------------------|-----------------------------|
| GY    | log $\mathcal{L}$ | -48                                     | -48                         | -48                         |
|       | parameters        | 29                                      | 29                          | 29                          |
|       | AIC               | 155                                     | 155                         | 155                         |
|       | G                 | 0.268 <sup>a</sup> (12.59) <sup>b</sup> | 0.268 (12.59)               | 0.268 (12.59)               |
|       | H                 | 0                                       | 0                           | 0                           |
|       | R                 | 0.324 (61.86) <sup>c</sup>              | 0.324 (61.86)               | 0.324 (61.86)               |
| PH    | log $\mathcal{L}$ | 2260                                    | 2246                        | 2248                        |
|       | parameters        | 27                                      | 27                          | 27                          |
|       | AIC               | -4466                                   | -4438                       | -4443                       |
|       | G                 | 1.981 (7.41)                            | 2.84 (9.98)                 | 2.502 (8.49)                |
|       | H                 | 1.423 (6.05) <sup>****</sup>            | 0.806 (3.68) <sup>***</sup> | 1.081 (4.44) <sup>***</sup> |
|       | R                 | 0.134 (56.2)                            | 0.134 (56.19)               | 0.134 (56.19)               |
| HD    | log $\mathcal{L}$ | 6358                                    | 6350                        | 6356                        |
|       | parameters        | 28                                      | 28                          | 28                          |
|       | AIC               | -12660                                  | -12643                      | -12656                      |
|       | G                 | 2.528 (9.24)                            | 2.937 (10.1)                | 2.468 (8.5)                 |
|       | H                 | 1.052 (4.83) <sup>****</sup>            | 0.749 (3.44) <sup>***</sup> | 1.16 (4.78) <sup>****</sup> |
|       | R                 | 0.054 (58.79)                           | 0.054 (58.76)               | 0.054 (58.78)               |
| TW    | log $\mathcal{L}$ | 1552                                    | 1547                        | 1549                        |
|       | parameters        | 29                                      | 29                          | 29                          |
|       | AIC               | -3046                                   | -3036                       | -3041                       |
|       | G                 | 0.746 (7.61)                            | 0.992 (9.51)                | 0.857 (8.24)                |
|       | H                 | 0.264 (3.38) <sup>***</sup>             | 0.064 (0.87)                | 0.183 (2.26) <sup>*</sup>   |
|       | R                 | 0.199 (60.1)                            | 0.199 (60.08)               | 0.199 (60.09)               |

<sup>a</sup>Variance component estimates reported for additive main effects (G) and epistatic interactions (H) are the ratios of the actual variance component to the residual variance component for ease of comparison.

<sup>b</sup>The variance component divided by their respective standard errors are shown in parentheses.

<sup>c</sup>The residual variance components, R, are the actual estimates from the centered and scaled data (refer to Santantonio et al. (2018) for scaling coefficients).

<sup>\*</sup>, <sup>\*\*</sup>, <sup>\*\*\*</sup>, <sup>\*\*\*\*</sup> denote p-values of  $p < 0.05$ ,  $p < 0.01$ ,  $p < 0.001$ ,  $p < 10^{-6}$ , respectively for the likelihood ratio test to determine if the epistatic variance component is zero.

Table S8: Prediction accuracies of Homeo, Within and Across genome marker sets for both  $\{-1, 1\}$  and  $\{0, 1\}$  marker coding using POS marker orientation.

| POS | Homeo <sub>-11</sub> | Homeo <sub>01</sub> | Within <sub>-11</sub> | Within <sub>01</sub> | Across <sub>-11</sub> | Across <sub>01</sub> |
|-----|----------------------|---------------------|-----------------------|----------------------|-----------------------|----------------------|
| GY  | 0.599 <sup>a</sup>   | 0.599               | 0.607                 | 0.600                | 0.607                 | 0.599                |
| PH  | 0.583                | 0.573               | 0.607                 | 0.568                | 0.612                 | 0.576                |
| TW  | 0.535                | 0.518               | 0.543                 | 0.514                | 0.547                 | 0.524                |
| HD  | 0.681                | 0.681               | 0.688                 | 0.670                | 0.698                 | 0.671                |

<sup>a</sup> mean Pearson correlation between predicted and observed genetic values across 10 random 5-fold cross-validation replications.

Table S9: Prediction accuracies of Homeo, Within and Across genome marker sets for both  $\{-1, 1\}$  and  $\{0, 1\}$  marker coding using NEG marker orientation.

| NEG | Homeo <sub>-11</sub> | Homeo <sub>01</sub> | Within <sub>-11</sub> | Within <sub>01</sub> | Across <sub>-11</sub> | Across <sub>01</sub> |
|-----|----------------------|---------------------|-----------------------|----------------------|-----------------------|----------------------|
| GY  | 0.602 <sup>a</sup>   | 0.599               | 0.612                 | 0.599                | 0.615                 | 0.600                |
| PH  | 0.589                | 0.582               | 0.620                 | 0.565                | 0.615                 | 0.579                |
| TW  | 0.535                | 0.513               | 0.555                 | 0.510                | 0.546                 | 0.519                |
| HD  | 0.676                | 0.671               | 0.698                 | 0.671                | 0.697                 | 0.680                |

<sup>a</sup> mean Pearson correlation between predicted and observed genetic values across 10 random 5-fold cross-validation replications.

Table S10: Prediction accuracies of Homeo, Within and Across genome marker sets for both  $\{-1, 1\}$  and  $\{0, 1\}$  marker coding using HTEV marker orientation.

| HTEV | Homeo <sub>-11</sub> | Homeo <sub>01</sub> | Within <sub>-11</sub> | Within <sub>01</sub> | Across <sub>-11</sub> | Across <sub>01</sub> |
|------|----------------------|---------------------|-----------------------|----------------------|-----------------------|----------------------|
| GY   | 0.601 <sup>a</sup>   | 0.601               | 0.616                 | 0.600                | 0.621                 | 0.600                |
| PH   | 0.591                | 0.565               | 0.640                 | 0.557                | 0.633                 | 0.558                |
| TW   | 0.548                | 0.513               | 0.572                 | 0.513                | 0.568                 | 0.513                |
| HD   | 0.688                | 0.669               | 0.700                 | 0.666                | 0.706                 | 0.667                |

<sup>a</sup> mean Pearson correlation between predicted and observed genetic values across 10 random 5-fold cross-validation replications.



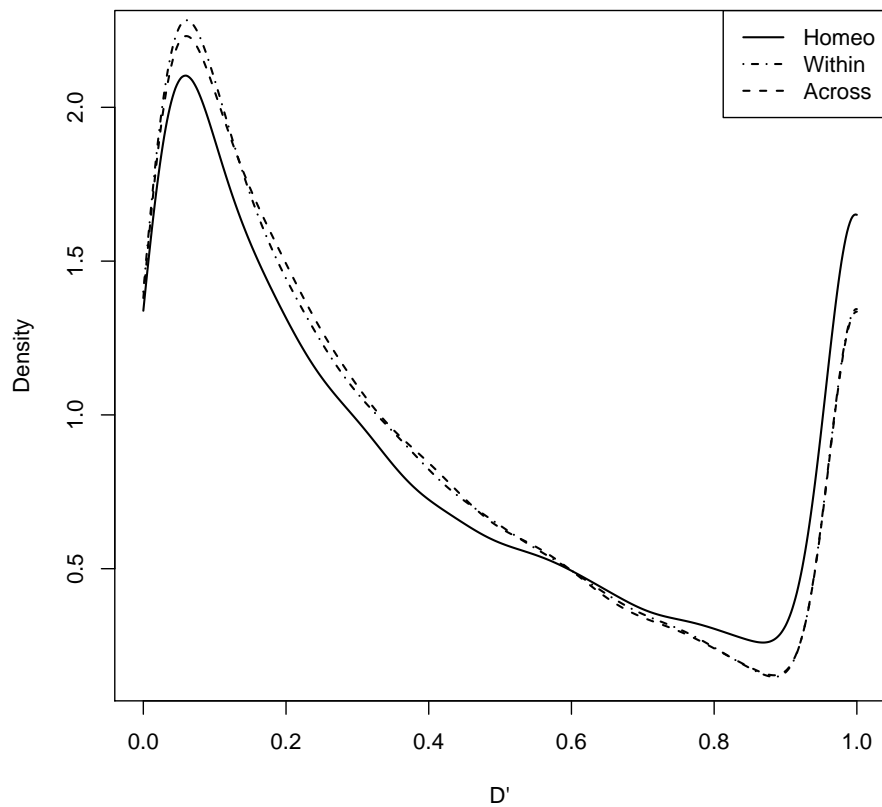

Figure S10: Smoothed densities of standardized  $D'$  statistics of linkage disequilibrium for expected and observed joint allele frequencies for Homeo, Within and Across marker sets. Kolmogorov-Smirnov (KS) tests were used to determine if the distribution of LD differed between Homeo and Within (KS p-value =  $1.1 \times 10^{-6}$ ) or Across (KS p-value =  $2.3 \times 10^{-13}$ ) marker sets.

Table S11: Estimated genetic correlation of traits with additive (below diagonal) and independent genetic relationships (above diagonal). Trait variances with a realized additive covariance between individuals and assuming independence are shown in parentheses on the diagonal, respectively.

|    | GY                  | PH           | TW         | HD         |
|----|---------------------|--------------|------------|------------|
| GY | (85726.9, 136494.6) | -0.39        | 0.16       | -0.24      |
| PH | -0.44               | (75.3, 60.4) | 0.05       | 0.31       |
| TW | -0.04               | 0.3          | (2.4, 2.3) | -0.28      |
| HD | -0.05               | 0.11         | -0.22      | (2.9, 2.9) |

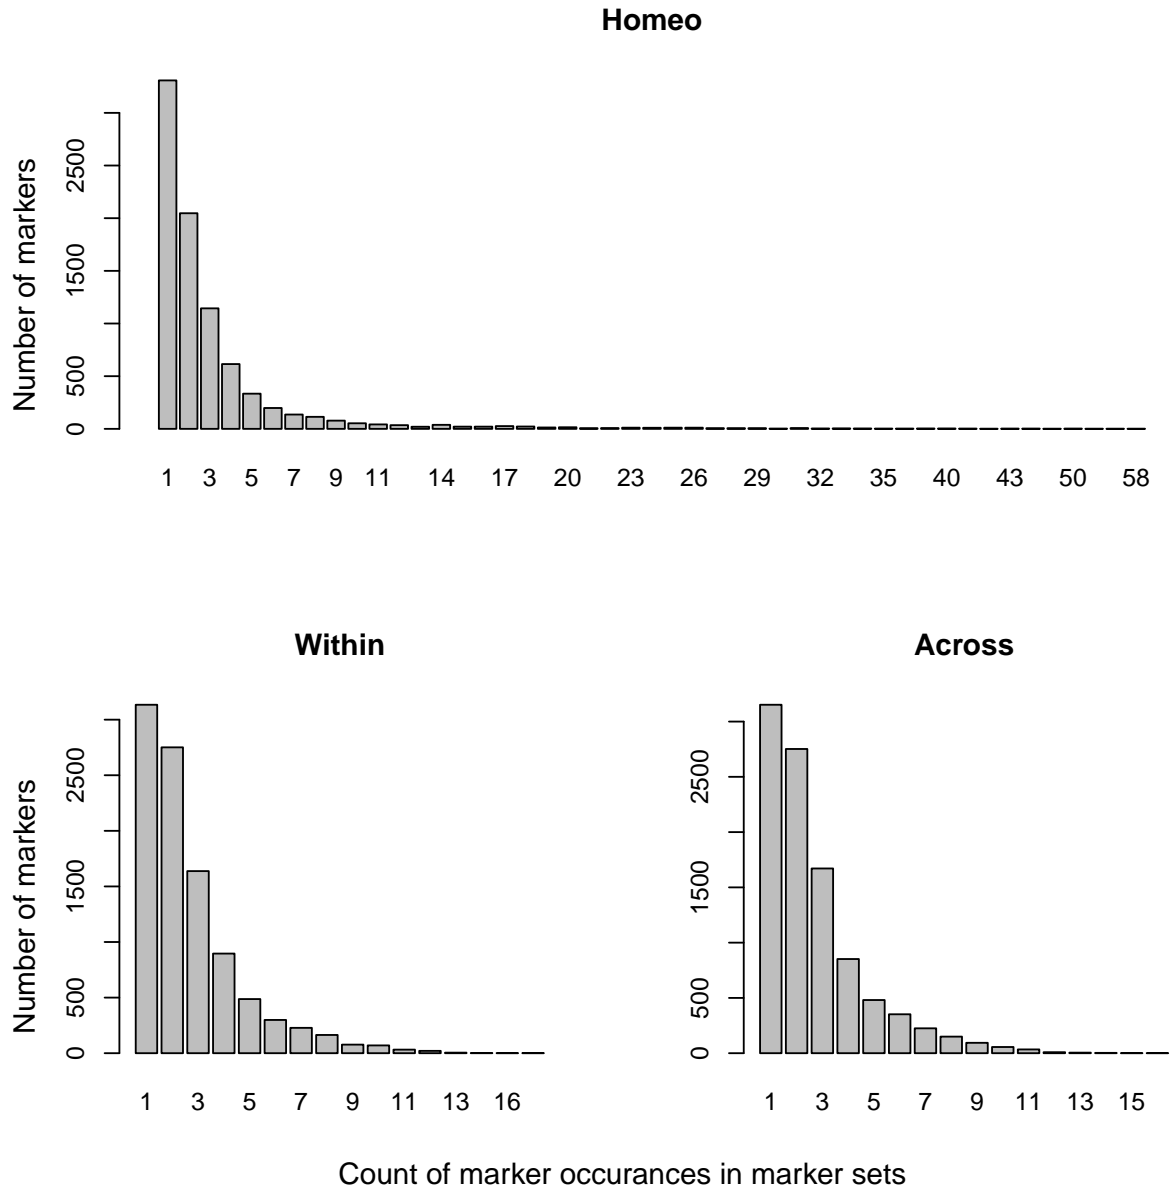

Figure S11: Distribution of the number of marker occurrences in marker sets. An occurrence of 1 indicates that a marker was only included in one marker set, whereas an occurrence of 10 would indicate that the marker was included in 10 marker sets.
